# Supplementary material for: Training deep learning models with a multi-station approach and static aquifer attributes for groundwater level simulation: what is the best way to leverage regionalised information?
Source: Copernicus journal article supplement (doi:10.5194/hess-29-841-2025), 2025-02-18
Supplement: Supplementary file 1 [file hess-29-841-2025-supplement.pdf]

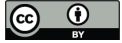

*Supplement of*

**Training deep learning models with a multi-station approach and static aquifer attributes for groundwater level simulation: what is the best way to leverage regionalised information?**

**Sivarama Krishna Reddy Chidepudi et al.**

*Correspondence to:* Sivarama Krishna Reddy Chidepudi ([sivaramakrishnareddy.chidepudi@univ-rouen.fr](mailto:sivaramakrishnareddy.chidepudi@univ-rouen.fr))

The copyright of individual parts of the supplement might differ from the article licence.

Table S1: List of GWL stations and corresponding class and static attributes

| Well ID               | Class    | longitude | latitude | Geological Context       | Medium: Type of Porosity | Lithology |
|-----------------------|----------|-----------|----------|--------------------------|--------------------------|-----------|
| 00068X0010/<br>F295   | mixed    | 2.09      | 50.80    | Magmatic and metamorphic | Matrix / cracks          | Chalk     |
| 00182X0010/<br>P1     | annual   | 2.27      | 50.50    | Sedimentary              | Matrix / cracks          | Chalk     |
| 00241X0012/<br>P1     | mixed    | 1.82      | 50.39    | Sedimentary              | Matrix / cracks          | Chalk     |
| 00263X0006/<br>P1     | mixed    | 2.70      | 50.39    | Magmatic and metamorphic | Matrix / cracks          | Chalk     |
| 00271X0002/<br>P2     | mixed    | 2.89      | 50.35    | Magmatic and metamorphic | Matrix / cracks          | Chalk     |
| 00332X0007/<br>S1     | mixed    | 1.95      | 50.19    | Sedimentary              | Matrix / cracks          | Chalk     |
| 00471X0095/<br>PZ2013 | mixed    | 2.58      | 50.02    | Sedimentary              | Matrix / cracks          | Chalk     |
| 00572X0010/<br>S1     | inertial | 0.51      | 49.79    | Sedimentary              | Matrix/fracture/karst    | Chalk     |
| 00578X0002/<br>S1     | inertial | 0.71      | 49.74    | Sedimentary              | Matrix/fracture/karst    | Chalk     |
| 00583X0005/<br>S1     | inertial | 0.91      | 49.78    | Sedimentary              | Matrix/fracture/karst    | Chalk     |
| 00608X0028/<br>S1     | inertial | 1.80      | 49.76    | Sedimentary              | Matrix/fracture/karst    | Chalk     |
| 00671X0052/<br>S1     | annual   | 4.04      | 49.84    | Sedimentary              | Matrix / cracks          | Chalk     |
| 00755X0006/<br>S1     | mixed    | 0.42      | 49.56    | Sedimentary              | Matrix/fracture/karst    | Chalk     |
| 00766X0004/<br>S1     | inertial | 0.84      | 49.57    | Sedimentary              | Matrix/fracture/karst    | Chalk     |
| 00773X0002/<br>S1     | mixed    | 1.28      | 49.60    | Sedimentary              | Matrix/fracture/karst    | Chalk     |
| 00791X0017/<br>S1     | mixed    | 1.82      | 49.62    | Sedimentary              | Matrix / cracks          | Chalk     |
| 00794X0021/<br>S1     | mixed    | 2.09      | 49.60    | Sedimentary              | Matrix / cracks          | Chalk     |
| 00805X0002/<br>S1     | mixed    | 2.21      | 49.55    | Sedimentary              | Matrix / cracks          | Chalk     |
| 00817X0145/<br>PZ_SN  | mixed    | 2.70      | 49.55    | Sedimentary              | Matrix / cracks          | Chalk     |

|                       |          |       |       |                                |                           |               |
|-----------------------|----------|-------|-------|--------------------------------|---------------------------|---------------|
| 00821X0035/<br>S1     | mixed    | 2.96  | 49.65 | Sedimentary                    | Matrix /<br>cracks        | Chalk         |
| 00847X0043/<br>S1     | annual   | 3.86  | 49.52 | Sedimentary                    | Matrix /<br>cracks        | Chalk         |
| 00853X0030/<br>PZ2013 | annual   | 4.16  | 49.61 | Sedimentary                    | Matrix /<br>cracks        | Chalk         |
| 00862X0005/<br>S1     | annual   | 4.42  | 49.60 | Magmatic<br>and<br>metamorphic | Porous                    | Sand          |
| 00957X0005/<br>S1     | mixed    | -0.90 | 49.37 | Sedimentary                    | Karst /<br>fissures       | Limeston<br>e |
| 00993X0002/<br>S1     | inertial | 0.98  | 49.48 | Sedimentary                    | Matrix/fract<br>ure/karst | Chalk         |
| 01003X0008/<br>S1     | mixed    | 1.26  | 49.43 | Sedimentary                    | Matrix/fract<br>ure/karst | Chalk         |
| 01013X0004/<br>S1     | mixed    | 1.63  | 49.44 | Sedimentary                    | Matrix/fract<br>ure/karst | Chalk         |
| 01024X0058/<br>S1     | mixed    | 2.10  | 49.45 | Sedimentary                    | Matrix /<br>cracks        | Chalk         |
| 01031X0023/<br>S1     | mixed    | 2.21  | 49.50 | Sedimentary                    | Matrix /<br>cracks        | Chalk         |
| 01045X0015/<br>S1     | mixed    | 2.54  | 49.36 | Sedimentary                    | Matrix /<br>cracks        | Chalk         |
| 01046X0010/<br>S1     | mixed    | 2.61  | 49.38 | Sedimentary                    | Matrix /<br>cracks        | Chalk         |
| 01053X0058/<br>S1     | inertial | 3.07  | 49.45 | Alluvial                       | Porous                    | Sand          |
| 01074X0006/<br>S1     | annual   | 3.92  | 49.49 | Sedimentary                    | Matrix /<br>cracks        | Chalk         |
| 01086X0011/<br>LS4    | annual   | 4.10  | 49.34 | Sedimentary                    | Matrix /<br>cracks        | Chalk         |
| 01116X0138/<br>F1     | annual   | 5.16  | 49.37 | Magmatic<br>and<br>metamorphic | Karst /<br>fissures       | Limeston<br>e |
| 01192X0043/<br>S1     | annual   | -0.60 | 49.25 | Sedimentary                    | Karst /<br>fissures       | Limeston<br>e |
| 01194X0069/<br>S1     | mixed    | -0.43 | 49.29 | Sedimentary                    | Karst /<br>fissures       | Limeston<br>e |
| 01198X0002/<br>S1     | inertial | -0.38 | 49.21 | Sedimentary                    | Karst /<br>fissures       | Limeston<br>e |
| 01245X0010/<br>S1     | inertial | 1.09  | 49.22 | Sedimentary                    | Matrix/fract<br>ure/karst | Chalk         |
| 01252X0011/<br>S1     | mixed    | 1.54  | 49.30 | Sedimentary                    | Matrix/fract<br>ure/karst | Chalk         |
| 01258X0020/<br>S1     | mixed    | 1.71  | 49.20 | Sedimentary                    | Matrix/fract<br>ure/karst | Chalk         |
| 01264X0029/<br>S1     | mixed    | 2.08  | 49.24 | Sedimentary                    | Matrix/fract<br>ure/karst | Chalk         |

|                     |          |       |       |                                |                           |               |
|---------------------|----------|-------|-------|--------------------------------|---------------------------|---------------|
| 01287X0017/<br>S1   | mixed    | 2.75  | 49.21 | Magmatic<br>and<br>metamorphic | Matrix /<br>cracks        | Sand          |
| 01347X0002/<br>S1   | annual   | 4.86  | 49.17 | Magmatic<br>and<br>metamorphic | Porous                    | Gaize         |
| 01381X0070/<br>P25  | annual   | 6.18  | 49.30 | Sedimentary                    | Porous                    | Alluvium      |
| 01461X0012/<br>S1   | inertial | -0.29 | 49.06 | Sedimentary                    | Karst /<br>fissures       | Limeston<br>e |
| 01473X0087/<br>S1   | inertial | 0.24  | 49.06 | Sedimentary                    | Matrix/fract<br>ure/karst | Chalk         |
| 01491X0009/<br>S1   | inertial | 0.77  | 49.11 | Sedimentary                    | Matrix/fract<br>ure/karst | Chalk         |
| 01516X0004/<br>S1   | inertial | 1.61  | 48.98 | Sedimentary                    | Matrix/fract<br>ure/karst | Chalk         |
| 01584X0023/<br>LV3  | annual   | 4.29  | 49.07 | Sedimentary                    | Matrix /<br>cracks        | Chalk         |
| 01871X0031/<br>S1   | mixed    | 3.65  | 48.89 | Not available                  | Porous                    | Marl          |
| 01995X0012/<br>342B | annual   | 7.98  | 48.81 | Sedimentary                    | Porous                    | Alluvium      |
| 02206X0022/<br>S1   | inertial | 2.68  | 48.61 | Magmatic<br>and<br>metamorphic | Karst /<br>fissures       | Limeston<br>e |
| 02225X0016/<br>S1   | mixed    | 3.28  | 48.62 | Sedimentary                    | Karst /<br>fissures       | Limeston<br>e |
| 02347X0022/<br>314  | mixed    | 7.75  | 48.65 | Sedimentary                    | Porous                    | Alluvium      |
| 02566X0019/<br>S1   | inertial | 1.90  | 48.46 | Magmatic<br>and<br>metamorphic | Karst /<br>fissures       | Limeston<br>e |
| 02617X0009/<br>S1   | annual   | 3.83  | 48.44 | Sedimentary                    | Matrix /<br>cracks        | Chalk         |
| 02636X0009/<br>S1   | mixed    | 4.49  | 48.44 | Sedimentary                    | Porous                    | Alluvium      |
| 02726X0029/<br>238  | annual   | 7.66  | 48.49 | Sedimentary                    | Porous                    | Alluvium      |
| 02923X0007/<br>F    | inertial | 1.99  | 48.38 | Magmatic<br>and<br>metamorphic | Porous                    | Sand          |
| 02931X0008/<br>S1   | inertial | 2.24  | 48.36 | Magmatic<br>and<br>metamorphic | Matrix /<br>cracks        | Limeston<br>e |
| 02974X0004/<br>S1   | annual   | 3.87  | 48.36 | Sedimentary                    | Matrix /<br>cracks        | Chalk         |

|                       |          |      |       |                                |                     |               |
|-----------------------|----------|------|-------|--------------------------------|---------------------|---------------|
| 03272X0006/<br>PZ     | inertial | 1.89 | 48.24 | Magmatic<br>and<br>metamorphic | Karst /<br>fissures | Limeston<br>e |
| 03276X0009/<br>P      | inertial | 1.92 | 48.10 | Magmatic<br>and<br>metamorphic | Karst /<br>fissures | Limeston<br>e |
| 03287X0018/<br>S1     | inertial | 2.35 | 48.09 | Magmatic<br>and<br>metamorphic | Karst /<br>fissures | Limeston<br>e |
| 03622X0027/<br>PZ     | inertial | 1.58 | 47.99 | Magmatic<br>and<br>metamorphic | Karst /<br>fissures | Limeston<br>e |
| 04132X0086/<br>PP6    | mixed    | 7.31 | 47.82 | Sedimentary                    | Porous              | Alluvium      |
| 04137X0018/<br>15     | mixed    | 7.42 | 47.72 | Sedimentary                    | Porous              | Alluvium      |
| 04398X0002/<br>SONDAG | annual   | 5.32 | 47.53 | Sedimentary                    | Karst               | Limeston<br>e |
| 04458X0023/<br>S3     | mixed    | 7.52 | 47.59 | Sedimentary                    | Porous              | Alluvium      |
| 00061X0117/<br>PZ1    | mixed    | 1.82 | 50.87 | Magmatic<br>and<br>metamorphic | Matrix /<br>cracks  | Chalk         |
| 00263X0129/<br>PZASA4 | mixed    | 2.72 | 50.33 | Magmatic<br>and<br>metamorphic | Matrix /<br>cracks  | Chalk         |
| 00275X0005/<br>P1     | inertial | 2.89 | 50.25 | Magmatic<br>and<br>metamorphic | Matrix /<br>cracks  | Chalk         |
| 00346X0011/<br>S1     | mixed    | 2.33 | 50.11 | Sedimentary                    | Matrix /<br>cracks  | Chalk         |
| 00463X0036/<br>H1     | mixed    | 2.36 | 49.95 | Sedimentary                    | Matrix /<br>cracks  | Chalk         |
| 02603X0009/<br>S1     | inertial | 3.44 | 48.58 | Sedimentary                    | Karst /<br>fissures | Limeston<br>e |

Table S2: Station wise training and testing dates and period. The first four years in the training period were used to make sequences hence only ERA5 data was used for this period.

| Code                | Training Period<br>(Dates)  | Training<br>Period<br>(Years) | Testing<br>Period<br>(Dates) | Testing Period<br>(Years) |
|---------------------|-----------------------------|-------------------------------|------------------------------|---------------------------|
| 00068X0010/F<br>295 | 1966-02-01 to<br>2014-12-01 | 49                            | 2015-01-01 to<br>2022-12-01  | 8                         |

|                       |                             |    |                             |   |
|-----------------------|-----------------------------|----|-----------------------------|---|
| 00182X0010/P<br>1     | 1966-02-01 to<br>2014-12-01 | 49 | 2015-01-01 to<br>2022-12-01 | 8 |
| 00241X0012/P<br>1     | 1968-04-01 to<br>2014-12-01 | 47 | 2015-01-01 to<br>2022-12-01 | 8 |
| 00263X0006/P<br>1     | 1966-02-01 to<br>2014-12-01 | 49 | 2015-01-01 to<br>2022-12-01 | 8 |
| 00271X0002/P<br>2     | 1966-02-01 to<br>2014-12-01 | 49 | 2015-01-01 to<br>2022-12-01 | 8 |
| 00332X0007/S<br>1     | 1966-02-01 to<br>2014-12-01 | 49 | 2015-01-01 to<br>2022-12-01 | 8 |
| 00471X0095/P<br>Z2013 | 1966-06-01 to<br>2014-12-01 | 49 | 2015-01-01 to<br>2022-12-01 | 8 |
| 00572X0010/S<br>1     | 1966-02-01 to<br>2014-12-01 | 49 | 2015-01-01 to<br>2022-12-01 | 8 |
| 00578X0002/S<br>1     | 1966-02-01 to<br>2014-12-01 | 49 | 2015-01-01 to<br>2022-12-01 | 8 |
| 00583X0005/S<br>1     | 1967-03-01 to<br>2014-12-01 | 48 | 2015-01-01 to<br>2022-12-01 | 8 |
| 00608X0028/S<br>1     | 1966-10-01 to<br>2014-12-01 | 48 | 2015-01-01 to<br>2022-12-01 | 8 |
| 00671X0052/S<br>1     | 1970-03-01 to<br>2014-12-01 | 45 | 2015-01-01 to<br>2022-12-01 | 8 |
| 00755X0006/S<br>1     | 1966-02-01 to<br>2014-12-01 | 49 | 2015-01-01 to<br>2022-12-01 | 8 |
| 00766X0004/S<br>1     | 1966-02-01 to<br>2014-12-01 | 49 | 2015-01-01 to<br>2022-12-01 | 8 |
| 00773X0002/S<br>1     | 1966-02-01 to<br>2014-12-01 | 49 | 2015-01-01 to<br>2022-12-01 | 8 |
| 00791X0017/S<br>1     | 1970-04-01 to<br>2014-12-01 | 45 | 2015-01-01 to<br>2022-12-01 | 8 |
| 00794X0021/S<br>1     | 1966-10-01 to<br>2014-12-01 | 48 | 2015-01-01 to<br>2022-12-01 | 8 |
| 00805X0002/S<br>1     | 1966-02-01 to<br>2014-12-01 | 49 | 2015-01-01 to<br>2022-12-01 | 8 |
| 00817X0145/P<br>Z_SN  | 1966-11-01 to<br>2014-12-01 | 48 | 2015-01-01 to<br>2022-12-01 | 8 |
| 00821X0035/S<br>1     | 1970-04-01 to<br>2014-12-01 | 45 | 2015-01-01 to<br>2022-12-01 | 8 |
| 00847X0043/S<br>1     | 1966-10-01 to<br>2014-12-01 | 48 | 2015-01-01 to<br>2022-12-01 | 8 |
| 00853X0030/P<br>Z2013 | 1966-02-01 to<br>2014-12-01 | 49 | 2015-01-01 to<br>2022-12-01 | 8 |
| 00862X0005/S<br>1     | 1967-02-01 to<br>2014-12-01 | 48 | 2015-01-01 to<br>2022-12-01 | 8 |
| 00957X0005/S<br>1     | 1970-02-01 to<br>2014-12-01 | 45 | 2015-01-01 to<br>2022-12-01 | 8 |
| 00993X0002/S<br>1     | 1966-02-01 to<br>2014-12-01 | 49 | 2015-01-01 to<br>2022-12-01 | 8 |

|                    |                             |    |                             |   |
|--------------------|-----------------------------|----|-----------------------------|---|
| 01003X0008/S<br>1  | 1966-02-01 to<br>2014-12-01 | 49 | 2015-01-01 to<br>2022-12-01 | 8 |
| 01013X0004/S<br>1  | 1967-03-01 to<br>2014-12-01 | 48 | 2015-01-01 to<br>2022-08-01 | 8 |
| 01024X0058/S<br>1  | 1970-02-01 to<br>2014-12-01 | 45 | 2015-01-01 to<br>2022-12-01 | 8 |
| 01031X0023/S<br>1  | 1966-10-01 to<br>2014-12-01 | 48 | 2015-01-01 to<br>2020-03-01 | 5 |
| 01045X0015/S<br>1  | 1966-10-01 to<br>2014-12-01 | 48 | 2015-01-01 to<br>2022-12-01 | 8 |
| 01046X0010/S<br>1  | 1966-02-01 to<br>2014-12-01 | 49 | 2015-01-01 to<br>2022-12-01 | 8 |
| 01053X0058/S<br>1  | 1966-10-01 to<br>2014-12-01 | 48 | 2015-01-01 to<br>2022-12-01 | 8 |
| 01074X0006/S<br>1  | 1966-10-01 to<br>2014-12-01 | 48 | 2015-01-01 to<br>2022-12-01 | 8 |
| 01086X0011/L<br>S4 | 1966-02-01 to<br>2014-12-01 | 49 | 2015-01-01 to<br>2022-12-01 | 8 |
| 01116X0138/F<br>1  | 1971-05-01 to<br>2014-12-01 | 44 | 2015-01-01 to<br>2022-12-01 | 8 |
| 01192X0043/S<br>1  | 1970-02-01 to<br>2014-12-01 | 45 | 2015-01-01 to<br>2022-12-01 | 8 |
| 01194X0069/S<br>1  | 1966-02-01 to<br>2014-12-01 | 49 | 2015-01-01 to<br>2022-12-01 | 8 |
| 01198X0002/S<br>1  | 1966-02-01 to<br>2014-12-01 | 49 | 2015-01-01 to<br>2022-12-01 | 8 |
| 01245X0010/S<br>1  | 1966-02-01 to<br>2014-12-01 | 49 | 2015-01-01 to<br>2022-12-01 | 8 |
| 01252X0011/S<br>1  | 1967-03-01 to<br>2014-12-01 | 48 | 2015-01-01 to<br>2022-12-01 | 8 |
| 01258X0020/S<br>1  | 1966-02-01 to<br>2014-12-01 | 49 | 2015-01-01 to<br>2022-12-01 | 8 |
| 01264X0029/S<br>1  | 1970-04-01 to<br>2014-12-01 | 45 | 2015-01-01 to<br>2022-12-01 | 8 |
| 01287X0017/S<br>1  | 1970-04-01 to<br>2014-12-01 | 45 | 2015-01-01 to<br>2022-12-01 | 8 |
| 01347X0002/S<br>1  | 1966-02-01 to<br>2014-12-01 | 49 | 2015-01-01 to<br>2022-12-01 | 8 |
| 01381X0070/P<br>25 | 1967-09-01 to<br>2014-12-01 | 47 | 2015-01-01 to<br>2022-12-01 | 8 |
| 01461X0012/S<br>1  | 1966-06-01 to<br>2014-12-01 | 49 | 2015-01-01 to<br>2022-12-01 | 8 |
| 01473X0087/S<br>1  | 1970-02-01 to<br>2014-12-01 | 45 | 2015-01-01 to<br>2022-12-01 | 8 |
| 01491X0009/S<br>1  | 1968-12-01 to<br>2014-12-01 | 46 | 2015-01-01 to<br>2022-12-01 | 8 |
| 01516X0004/S<br>1  | 1966-02-01 to<br>2014-12-01 | 49 | 2015-01-01 to<br>2022-12-01 | 8 |

|                       |                             |    |                             |   |
|-----------------------|-----------------------------|----|-----------------------------|---|
| 01584X0023/L<br>V3    | 1966-02-01 to<br>2014-12-01 | 49 | 2015-01-01 to<br>2022-12-01 | 8 |
| 01871X0031/S<br>1     | 1966-02-01 to<br>2014-12-01 | 49 | 2015-01-01 to<br>2022-12-01 | 8 |
| 01995X0012/3<br>42B   | 1966-02-01 to<br>2014-12-01 | 49 | 2015-01-01 to<br>2022-12-01 | 8 |
| 02206X0022/S<br>1     | 1969-06-01 to<br>2014-12-01 | 46 | 2015-01-01 to<br>2022-12-01 | 8 |
| 02225X0016/S<br>1     | 1967-02-01 to<br>2014-12-01 | 48 | 2015-01-01 to<br>2022-12-01 | 8 |
| 02347X0022/3<br>14    | 1966-02-01 to<br>2014-12-01 | 49 | 2015-01-01 to<br>2022-12-01 | 8 |
| 02566X0019/S<br>1     | 1970-03-01 to<br>2014-12-01 | 45 | 2015-01-01 to<br>2022-12-01 | 8 |
| 02617X0009/S<br>1     | 1966-02-01 to<br>2014-12-01 | 49 | 2015-01-01 to<br>2022-12-01 | 8 |
| 02636X0009/S<br>1     | 1966-02-01 to<br>2014-12-01 | 49 | 2015-01-01 to<br>2022-12-01 | 8 |
| 02726X0029/2<br>38    | 1966-02-01 to<br>2014-12-01 | 49 | 2015-01-01 to<br>2022-12-01 | 8 |
| 02923X0007/F          | 1970-12-01 to<br>2014-12-01 | 44 | 2015-01-01 to<br>2022-12-01 | 8 |
| 02931X0008/S<br>1     | 1966-09-01 to<br>2014-12-01 | 48 | 2015-01-01 to<br>2022-12-01 | 8 |
| 02974X0004/S<br>1     | 1966-02-01 to<br>2014-12-01 | 49 | 2015-01-01 to<br>2022-12-01 | 8 |
| 03272X0006/P<br>Z     | 1966-02-01 to<br>2014-12-01 | 49 | 2015-01-01 to<br>2022-12-01 | 8 |
| 03276X0009/P          | 1966-02-01 to<br>2014-12-01 | 49 | 2015-01-01 to<br>2022-12-01 | 8 |
| 03287X0018/S<br>1     | 1966-02-01 to<br>2014-12-01 | 49 | 2015-01-01 to<br>2022-12-01 | 8 |
| 03622X0027/P<br>Z     | 1966-02-01 to<br>2014-12-01 | 49 | 2015-01-01 to<br>2022-12-01 | 8 |
| 04132X0086/P<br>P6    | 1970-03-01 to<br>2014-12-01 | 45 | 2015-01-01 to<br>2022-12-01 | 8 |
| 04137X0018/1<br>5     | 1966-02-01 to<br>2014-12-01 | 49 | 2015-01-01 to<br>2022-01-01 | 7 |
| 04398X0002/S<br>ONDAG | 1970-02-01 to<br>2014-12-01 | 45 | 2015-01-01 to<br>2022-12-01 | 8 |
| 04458X0023/S<br>3     | 1971-12-01 to<br>2014-12-01 | 43 | 2015-01-01 to<br>2022-12-01 | 8 |
| 00061X0117/P<br>Z1    | 1966-02-01 to<br>2014-12-01 | 49 | 2015-01-01 to<br>2022-12-01 | 8 |
| 00263X0129/P<br>ZASA4 | 1970-02-01 to<br>2014-12-01 | 45 | 2015-01-01 to<br>2022-12-01 | 8 |
| 00275X0005/P<br>1     | 1966-02-01 to<br>2014-12-01 | 49 | 2015-01-01 to<br>2022-12-01 | 8 |



|                   |                             |    |                             |   |
|-------------------|-----------------------------|----|-----------------------------|---|
| 00346X0011/S<br>1 | 1966-02-01 to<br>2014-12-01 | 49 | 2015-01-01 to<br>2022-12-01 | 8 |
| 00463X0036/H<br>1 | 1966-02-01 to<br>2014-12-01 | 49 | 2015-01-01 to<br>2022-12-01 | 8 |
| 02603X0009/S<br>1 | 1966-02-01 to<br>2014-12-01 | 49 | 2015-01-01 to<br>2022-12-01 | 8 |

Table S3: Best hyperparameters for all standalone models of single station approach

| Code                | Best Params GRU                                                                                                                                                          | Best Params LSTM                                                                                                                                                        | Best Params BILSTM                                                                                                                                                       |
|---------------------|--------------------------------------------------------------------------------------------------------------------------------------------------------------------------|-------------------------------------------------------------------------------------------------------------------------------------------------------------------------|--------------------------------------------------------------------------------------------------------------------------------------------------------------------------|
| 00068X0010/<br>F295 | {'learning_rate':<br>0.0031514252640<br>40375, 'optimizer':<br>'adam', 'epochs':<br>150, 'batch_size':<br>64, 'n_layers': 1,<br>'n_units_l0': 80,<br>'dropout_l0': 0.2}  | {'learning_rate':<br>0.00428564073579<br>5779, 'optimizer':<br>'adam', 'epochs':<br>300, 'batch_size':<br>48, 'n_layers': 1,<br>'n_units_l0': 80,<br>'dropout_l0': 0.2} | {'learning_rate':<br>0.001300122762188<br>1476, 'optimizer':<br>'adam', 'epochs': 450,<br>'batch_size': 16,<br>'n_layers': 1,<br>'n_units_l0': 70,<br>'dropout_l0': 0.2} |
| 00182X0010/<br>P1   | {'learning_rate':<br>0.0072913051607<br>43269, 'optimizer':<br>'adam', 'epochs':<br>200, 'batch_size':<br>80, 'n_layers': 1,<br>'n_units_l0': 100,<br>'dropout_l0': 0.2} | {'learning_rate':<br>0.00970748029584<br>1904, 'optimizer':<br>'adam', 'epochs':<br>400, 'batch_size':<br>64, 'n_layers': 1,<br>'n_units_l0': 30,<br>'dropout_l0': 0.2} | {'learning_rate':<br>0.003463167158483<br>116, 'optimizer':<br>'adam', 'epochs': 250,<br>'batch_size': 48,<br>'n_layers': 1,<br>'n_units_l0': 90,<br>'dropout_l0': 0.2}  |
| 00241X0012/<br>P1   | {'learning_rate':<br>0.0069389690997<br>4053, 'optimizer':<br>'adam', 'epochs':<br>350, 'batch_size':<br>16, 'n_layers': 1,<br>'n_units_l0': 20,<br>'dropout_l0': 0.2}   | {'learning_rate':<br>0.00899346316958<br>4801, 'optimizer':<br>'adam', 'epochs':<br>500, 'batch_size':<br>32, 'n_layers': 1,<br>'n_units_l0': 20,<br>'dropout_l0': 0.2} | {'learning_rate':<br>0.001300122762188<br>1476, 'optimizer':<br>'adam', 'epochs': 450,<br>'batch_size': 16,<br>'n_layers': 1,<br>'n_units_l0': 70,<br>'dropout_l0': 0.2} |
| 00263X0006/<br>P1   | {'learning_rate':<br>0.0068217773984<br>60312, 'optimizer':<br>'adam', 'epochs':<br>350, 'batch_size':<br>144, 'n_layers': 1,<br>'n_units_l0': 50,<br>'dropout_l0': 0.2} | {'learning_rate':<br>0.00810305675553<br>2596, 'optimizer':<br>'adam', 'epochs':<br>200, 'batch_size':<br>32, 'n_layers': 1,<br>'n_units_l0': 40,<br>'dropout_l0': 0.2} | {'learning_rate':<br>0.008103056755532<br>596, 'optimizer':<br>'adam', 'epochs': 200,<br>'batch_size': 32,<br>'n_layers': 1,<br>'n_units_l0': 40,<br>'dropout_l0': 0.2}  |
| 00271X0002/<br>P2   | {'learning_rate':<br>0.0081030567555<br>32596, 'optimizer':<br>'adam', 'epochs':<br>200, 'batch_size':                                                                   | {'learning_rate':<br>0.00514309427673<br>1783, 'optimizer':<br>'adam', 'epochs':<br>400, 'batch_size':                                                                  | {'learning_rate':<br>0.001009132669840<br>099, 'optimizer':<br>'adam', 'epochs': 300,<br>'batch_size': 224,                                                              |

|                   |                                                                                                                                                    |                                                                                                                                                    |                                                                                                                                                     |
|-------------------|----------------------------------------------------------------------------------------------------------------------------------------------------|----------------------------------------------------------------------------------------------------------------------------------------------------|-----------------------------------------------------------------------------------------------------------------------------------------------------|
|                   | 32, 'n_layers': 1, 'n_units_l0': 40, 'dropout_l0': 0.2}                                                                                            | 160, 'n_layers': 1, 'n_units_l0': 100, 'dropout_l0': 0.2}                                                                                          | 'n_layers': 1, 'n_units_l0': 70, 'dropout_l0': 0.2}                                                                                                 |
| 00332X0007/S1     | {'learning_rate': 0.005269329024971373, 'optimizer': 'adam', 'epochs': 150, 'batch_size': 240, 'n_layers': 1, 'n_units_l0': 80, 'dropout_l0': 0.2} | {'learning_rate': 0.005269329024971373, 'optimizer': 'adam', 'epochs': 150, 'batch_size': 240, 'n_layers': 1, 'n_units_l0': 80, 'dropout_l0': 0.2} | {'learning_rate': 0.001440785178275633, 'optimizer': 'adam', 'epochs': 450, 'batch_size': 16, 'n_layers': 1, 'n_units_l0': 50, 'dropout_l0': 0.2}   |
| 00471X0095/PZ2013 | {'learning_rate': 0.009605417373868429, 'optimizer': 'adam', 'epochs': 100, 'batch_size': 96, 'n_layers': 1, 'n_units_l0': 90, 'dropout_l0': 0.2}  | {'learning_rate': 0.0013001227621881476, 'optimizer': 'adam', 'epochs': 450, 'batch_size': 16, 'n_layers': 1, 'n_units_l0': 70, 'dropout_l0': 0.2} | {'learning_rate': 0.0019406407042248572, 'optimizer': 'adam', 'epochs': 350, 'batch_size': 16, 'n_layers': 1, 'n_units_l0': 90, 'dropout_l0': 0.2}  |
| 00572X0010/S1     | {'learning_rate': 0.005269329024971373, 'optimizer': 'adam', 'epochs': 150, 'batch_size': 240, 'n_layers': 1, 'n_units_l0': 80, 'dropout_l0': 0.2} | {'learning_rate': 0.0013001227621881476, 'optimizer': 'adam', 'epochs': 450, 'batch_size': 16, 'n_layers': 1, 'n_units_l0': 70, 'dropout_l0': 0.2} | {'learning_rate': 0.001009132669840099, 'optimizer': 'adam', 'epochs': 300, 'batch_size': 224, 'n_layers': 1, 'n_units_l0': 70, 'dropout_l0': 0.2}  |
| 00578X0002/S1     | {'learning_rate': 0.003729090520557473, 'optimizer': 'adam', 'epochs': 400, 'batch_size': 64, 'n_layers': 1, 'n_units_l0': 70, 'dropout_l0': 0.2}  | {'learning_rate': 0.005269329024971373, 'optimizer': 'adam', 'epochs': 150, 'batch_size': 240, 'n_layers': 1, 'n_units_l0': 80, 'dropout_l0': 0.2} | {'learning_rate': 0.0019464388531750198, 'optimizer': 'adam', 'epochs': 250, 'batch_size': 224, 'n_layers': 1, 'n_units_l0': 80, 'dropout_l0': 0.2} |
| 00583X0005/S1     | {'learning_rate': 0.001009132669840099, 'optimizer': 'adam', 'epochs': 300, 'batch_size': 224, 'n_layers': 1, 'n_units_l0': 70, 'dropout_l0': 0.2} | {'learning_rate': 0.006821777398460312, 'optimizer': 'adam', 'epochs': 350, 'batch_size': 144, 'n_layers': 1, 'n_units_l0': 50, 'dropout_l0': 0.2} | {'learning_rate': 0.001009132669840099, 'optimizer': 'adam', 'epochs': 300, 'batch_size': 224, 'n_layers': 1, 'n_units_l0': 70, 'dropout_l0': 0.2}  |
| 00608X0028/S1     | {'learning_rate': 0.003151425264040375, 'optimizer': 'adam', 'epochs': 150, 'batch_size': 64, 'n_layers': 1,                                       | {'learning_rate': 0.003151425264040375, 'optimizer': 'adam', 'epochs': 150, 'batch_size': 64, 'n_layers': 1,                                       | {'learning_rate': 0.001009132669840099, 'optimizer': 'adam', 'epochs': 300, 'batch_size': 224, 'n_layers': 1,                                       |

|                   |                                                                                                                                                                              |                                                                                                                                                                           |                                                                                                                                                                           |
|-------------------|------------------------------------------------------------------------------------------------------------------------------------------------------------------------------|---------------------------------------------------------------------------------------------------------------------------------------------------------------------------|---------------------------------------------------------------------------------------------------------------------------------------------------------------------------|
|                   | 'n_units_l0': 80,<br>'dropout_l0': 0.2}                                                                                                                                      | 'n_units_l0': 80,<br>'dropout_l0': 0.2}                                                                                                                                   | 'n_units_l0': 70,<br>'dropout_l0': 0.2}                                                                                                                                   |
| 00671X0052/<br>S1 | {'learning_rate':<br>0.0019869077621<br>547677,<br>'optimizer': 'adam',<br>'epochs': 300,<br>'batch_size': 64,<br>'n_layers': 1,<br>'n_units_l0': 100,<br>'dropout_l0': 0.2} | {'learning_rate':<br>0.00810305675553<br>2596, 'optimizer':<br>'adam', 'epochs':<br>200, 'batch_size':<br>32, 'n_layers': 1,<br>'n_units_l0': 40,<br>'dropout_l0': 0.2}   | {'learning_rate':<br>0.002765878983990<br>4367, 'optimizer':<br>'adam', 'epochs': 250,<br>'batch_size': 160,<br>'n_layers': 1,<br>'n_units_l0': 60,<br>'dropout_l0': 0.2} |
| 00755X0006/<br>S1 | {'learning_rate':<br>0.0013001227621<br>881476,<br>'optimizer': 'adam',<br>'epochs': 450,<br>'batch_size': 16,<br>'n_layers': 1,<br>'n_units_l0': 70,<br>'dropout_l0': 0.2}  | {'learning_rate':<br>0.00276587898399<br>04367, 'optimizer':<br>'adam', 'epochs':<br>250, 'batch_size':<br>160, 'n_layers': 1,<br>'n_units_l0': 60,<br>'dropout_l0': 0.2} | {'learning_rate':<br>0.001471958750607<br>762, 'optimizer':<br>'adam', 'epochs': 450,<br>'batch_size': 16,<br>'n_layers': 1,<br>'n_units_l0': 70,<br>'dropout_l0': 0.2}   |
| 00766X0004/<br>S1 | {'learning_rate':<br>0.0031514252640<br>40375, 'optimizer':<br>'adam', 'epochs':<br>150, 'batch_size':<br>64, 'n_layers': 1,<br>'n_units_l0': 80,<br>'dropout_l0': 0.2}      | {'learning_rate':<br>0.00526932902497<br>1373, 'optimizer':<br>'adam', 'epochs':<br>150, 'batch_size':<br>240, 'n_layers': 1,<br>'n_units_l0': 80,<br>'dropout_l0': 0.2}  | {'learning_rate':<br>0.001346013249503<br>339, 'optimizer':<br>'adam', 'epochs': 450,<br>'batch_size': 48,<br>'n_layers': 1,<br>'n_units_l0': 50,<br>'dropout_l0': 0.2}   |
| 00773X0002/<br>S1 | {'learning_rate':<br>0.0031514252640<br>40375, 'optimizer':<br>'adam', 'epochs':<br>150, 'batch_size':<br>64, 'n_layers': 1,<br>'n_units_l0': 80,<br>'dropout_l0': 0.2}      | {'learning_rate':<br>0.00526932902497<br>1373, 'optimizer':<br>'adam', 'epochs':<br>150, 'batch_size':<br>240, 'n_layers': 1,<br>'n_units_l0': 80,<br>'dropout_l0': 0.2}  | {'learning_rate':<br>0.003151425264040<br>375, 'optimizer':<br>'adam', 'epochs': 150,<br>'batch_size': 64,<br>'n_layers': 1,<br>'n_units_l0': 80,<br>'dropout_l0': 0.2}   |
| 00791X0017/<br>S1 | {'learning_rate':<br>0.0065629117577<br>11773, 'optimizer':<br>'adam', 'epochs':<br>400, 'batch_size':<br>16, 'n_layers': 1,<br>'n_units_l0': 90,<br>'dropout_l0': 0.2}      | {'learning_rate':<br>0.00130012276218<br>81476, 'optimizer':<br>'adam', 'epochs':<br>450, 'batch_size':<br>16, 'n_layers': 1,<br>'n_units_l0': 70,<br>'dropout_l0': 0.2}  | {'learning_rate':<br>0.001300122762188<br>1476, 'optimizer':<br>'adam', 'epochs': 450,<br>'batch_size': 16,<br>'n_layers': 1,<br>'n_units_l0': 70,<br>'dropout_l0': 0.2}  |
| 00794X0021/<br>S1 | {'learning_rate':<br>0.0088197537069<br>64301, 'optimizer':<br>'adam', 'epochs':<br>500, 'batch_size':<br>16, 'n_layers': 1,                                                 | {'learning_rate':<br>0.00100913266984<br>0099, 'optimizer':<br>'adam', 'epochs':<br>300, 'batch_size':<br>224, 'n_layers': 1,                                             | {'learning_rate':<br>0.003487742134799<br>628, 'optimizer':<br>'adam', 'epochs': 100,<br>'batch_size': 96,<br>'n_layers': 1,                                              |

|                       |                                                                                                                                                                             |                                                                                                                                                                          |                                                                                                                                                                          |
|-----------------------|-----------------------------------------------------------------------------------------------------------------------------------------------------------------------------|--------------------------------------------------------------------------------------------------------------------------------------------------------------------------|--------------------------------------------------------------------------------------------------------------------------------------------------------------------------|
|                       | 'n_units_l0': 20,<br>'dropout_l0': 0.2}                                                                                                                                     | 'n_units_l0': 70,<br>'dropout_l0': 0.2}                                                                                                                                  | 'n_units_l0': 70,<br>'dropout_l0': 0.2}                                                                                                                                  |
| 00805X0002/<br>S1     | {'learning_rate':<br>0.0097734365310<br>85809, 'optimizer':<br>'adam', 'epochs':<br>100, 'batch_size':<br>96, 'n_layers': 1,<br>'n_units_l0': 90,<br>'dropout_l0': 0.2}     | {'learning_rate':<br>0.00100913266984<br>0099, 'optimizer':<br>'adam', 'epochs':<br>300, 'batch_size':<br>224, 'n_layers': 1,<br>'n_units_l0': 70,<br>'dropout_l0': 0.2} | {'learning_rate':<br>0.001582159258248<br>7883, 'optimizer':<br>'adam', 'epochs': 150,<br>'batch_size': 80,<br>'n_layers': 1,<br>'n_units_l0': 80,<br>'dropout_l0': 0.2} |
| 00817X0145/<br>PZ_SN  | {'learning_rate':<br>0.0022009248329<br>412116,<br>'optimizer': 'adam',<br>'epochs': 500,<br>'batch_size': 16,<br>'n_layers': 1,<br>'n_units_l0': 40,<br>'dropout_l0': 0.2} | {'learning_rate':<br>0.00130012276218<br>81476, 'optimizer':<br>'adam', 'epochs':<br>450, 'batch_size':<br>16, 'n_layers': 1,<br>'n_units_l0': 70,<br>'dropout_l0': 0.2} | {'learning_rate':<br>0.001300122762188<br>1476, 'optimizer':<br>'adam', 'epochs': 450,<br>'batch_size': 16,<br>'n_layers': 1,<br>'n_units_l0': 70,<br>'dropout_l0': 0.2} |
| 00821X0035/<br>S1     | {'learning_rate':<br>0.0081030567555<br>32596, 'optimizer':<br>'adam', 'epochs':<br>200, 'batch_size':<br>32, 'n_layers': 1,<br>'n_units_l0': 40,<br>'dropout_l0': 0.2}     | {'learning_rate':<br>0.00100913266984<br>0099, 'optimizer':<br>'adam', 'epochs':<br>300, 'batch_size':<br>224, 'n_layers': 1,<br>'n_units_l0': 70,<br>'dropout_l0': 0.2} | {'learning_rate':<br>0.001009132669840<br>099, 'optimizer':<br>'adam', 'epochs': 300,<br>'batch_size': 224,<br>'n_layers': 1,<br>'n_units_l0': 70,<br>'dropout_l0': 0.2} |
| 00847X0043/<br>S1     | {'learning_rate':<br>0.0099812634292<br>3339, 'optimizer':<br>'adam', 'epochs':<br>400, 'batch_size':<br>96, 'n_layers': 1,<br>'n_units_l0': 30,<br>'dropout_l0': 0.2}      | {'learning_rate':<br>0.00763090117816<br>6286, 'optimizer':<br>'adam', 'epochs':<br>200, 'batch_size':<br>32, 'n_layers': 1,<br>'n_units_l0': 50,<br>'dropout_l0': 0.2}  | {'learning_rate':<br>0.003151425264040<br>375, 'optimizer':<br>'adam', 'epochs': 150,<br>'batch_size': 64,<br>'n_layers': 1,<br>'n_units_l0': 80,<br>'dropout_l0': 0.2}  |
| 00853X0030/<br>PZ2013 | {'learning_rate':<br>0.0052693290249<br>71373, 'optimizer':<br>'adam', 'epochs':<br>150, 'batch_size':<br>240, 'n_layers': 1,<br>'n_units_l0': 80,<br>'dropout_l0': 0.2}    | {'learning_rate':<br>0.00315142526404<br>0375, 'optimizer':<br>'adam', 'epochs':<br>150, 'batch_size':<br>64, 'n_layers': 1,<br>'n_units_l0': 80,<br>'dropout_l0': 0.2}  | {'learning_rate':<br>0.003151425264040<br>375, 'optimizer':<br>'adam', 'epochs': 150,<br>'batch_size': 64,<br>'n_layers': 1,<br>'n_units_l0': 80,<br>'dropout_l0': 0.2}  |
| 00862X0005/<br>S1     | {'learning_rate':<br>0.0031514252640<br>40375, 'optimizer':<br>'adam', 'epochs':<br>150, 'batch_size':<br>64, 'n_layers': 1,                                                | {'learning_rate':<br>0.00832946034901<br>4989, 'optimizer':<br>'adam', 'epochs':<br>500, 'batch_size':<br>16, 'n_layers': 1,                                             | {'learning_rate':<br>0.008103056755532<br>596, 'optimizer':<br>'adam', 'epochs': 200,<br>'batch_size': 32,<br>'n_layers': 1,                                             |

|                   |                                                                                                                                                                          |                                                                                                                                                                          |                                                                                                                                                                          |
|-------------------|--------------------------------------------------------------------------------------------------------------------------------------------------------------------------|--------------------------------------------------------------------------------------------------------------------------------------------------------------------------|--------------------------------------------------------------------------------------------------------------------------------------------------------------------------|
|                   | 'n_units_l0': 80,<br>'dropout_l0': 0.2}                                                                                                                                  | 'n_units_l0': 20,<br>'dropout_l0': 0.2}                                                                                                                                  | 'n_units_l0': 40,<br>'dropout_l0': 0.2}                                                                                                                                  |
| 00957X0005/<br>S1 | {'learning_rate':<br>0.0052626384661<br>67993, 'optimizer':<br>'adam', 'epochs':<br>300, 'batch_size':<br>32, 'n_layers': 1,<br>'n_units_l0': 50,<br>'dropout_l0': 0.2}  | {'learning_rate':<br>0.00574143477026<br>8582, 'optimizer':<br>'adam', 'epochs':<br>350, 'batch_size':<br>48, 'n_layers': 1,<br>'n_units_l0': 60,<br>'dropout_l0': 0.2}  | {'learning_rate':<br>0.004228752765456<br>0056, 'optimizer':<br>'adam', 'epochs': 350,<br>'batch_size': 48,<br>'n_layers': 1,<br>'n_units_l0': 90,<br>'dropout_l0': 0.2} |
| 00993X0002/<br>S1 | {'learning_rate':<br>0.0052693290249<br>71373, 'optimizer':<br>'adam', 'epochs':<br>150, 'batch_size':<br>240, 'n_layers': 1,<br>'n_units_l0': 80,<br>'dropout_l0': 0.2} | {'learning_rate':<br>0.00526932902497<br>1373, 'optimizer':<br>'adam', 'epochs':<br>150, 'batch_size':<br>240, 'n_layers': 1,<br>'n_units_l0': 80,<br>'dropout_l0': 0.2} | {'learning_rate':<br>0.005269329024971<br>373, 'optimizer':<br>'adam', 'epochs': 150,<br>'batch_size': 240,<br>'n_layers': 1,<br>'n_units_l0': 80,<br>'dropout_l0': 0.2} |
| 01003X0008/<br>S1 | {'learning_rate':<br>0.0010091326698<br>40099, 'optimizer':<br>'adam', 'epochs':<br>300, 'batch_size':<br>224, 'n_layers': 1,<br>'n_units_l0': 70,<br>'dropout_l0': 0.2} | {'learning_rate':<br>0.00100913266984<br>0099, 'optimizer':<br>'adam', 'epochs':<br>300, 'batch_size':<br>224, 'n_layers': 1,<br>'n_units_l0': 70,<br>'dropout_l0': 0.2} | {'learning_rate':<br>0.005269329024971<br>373, 'optimizer':<br>'adam', 'epochs': 150,<br>'batch_size': 240,<br>'n_layers': 1,<br>'n_units_l0': 80,<br>'dropout_l0': 0.2} |
| 01013X0004/<br>S1 | {'learning_rate':<br>0.0097201730778<br>7352, 'optimizer':<br>'adam', 'epochs':<br>400, 'batch_size':<br>128, 'n_layers': 1,<br>'n_units_l0': 30,<br>'dropout_l0': 0.2}  | {'learning_rate':<br>0.00348774213479<br>9628, 'optimizer':<br>'adam', 'epochs':<br>100, 'batch_size':<br>96, 'n_layers': 1,<br>'n_units_l0': 70,<br>'dropout_l0': 0.2}  | {'learning_rate':<br>0.001763895960635<br>3453, 'optimizer':<br>'adam', 'epochs': 500,<br>'batch_size': 16,<br>'n_layers': 1,<br>'n_units_l0': 10,<br>'dropout_l0': 0.2} |
| 01024X0058/<br>S1 | {'learning_rate':<br>0.0097074802958<br>41904, 'optimizer':<br>'adam', 'epochs':<br>400, 'batch_size':<br>64, 'n_layers': 1,<br>'n_units_l0': 30,<br>'dropout_l0': 0.2}  | {'learning_rate':<br>0.00130012276218<br>81476, 'optimizer':<br>'adam', 'epochs':<br>450, 'batch_size':<br>16, 'n_layers': 1,<br>'n_units_l0': 70,<br>'dropout_l0': 0.2} | {'learning_rate':<br>0.002419619449357<br>1197, 'optimizer':<br>'adam', 'epochs': 400,<br>'batch_size': 32,<br>'n_layers': 1,<br>'n_units_l0': 50,<br>'dropout_l0': 0.2} |
| 01031X0023/<br>S1 | {'learning_rate':<br>0.0031514252640<br>40375, 'optimizer':<br>'adam', 'epochs':<br>150, 'batch_size':<br>64, 'n_layers': 1,<br>'n_units_l0': 80,<br>'dropout_l0': 0.2}  | {'learning_rate':<br>0.00100913266984<br>0099, 'optimizer':<br>'adam', 'epochs':<br>300, 'batch_size':<br>224, 'n_layers': 1,<br>'n_units_l0': 70,<br>'dropout_l0': 0.2} | {'learning_rate':<br>0.001488662275444<br>4637, 'optimizer':<br>'adam', 'epochs': 150,<br>'batch_size': 48,<br>'n_layers': 1,<br>'n_units_l0': 50,<br>'dropout_l0': 0.2} |

|                    |                                                                                                                                                                             |                                                                                                                                                                          |                                                                                                                                                                           |
|--------------------|-----------------------------------------------------------------------------------------------------------------------------------------------------------------------------|--------------------------------------------------------------------------------------------------------------------------------------------------------------------------|---------------------------------------------------------------------------------------------------------------------------------------------------------------------------|
| 01045X0015/<br>S1  | {'learning_rate':<br>0.0088197537069<br>64301, 'optimizer':<br>'adam', 'epochs':<br>500, 'batch_size':<br>16, 'n_layers': 1,<br>'n_units_l0': 20,<br>'dropout_l0': 0.2}     | {'learning_rate':<br>0.00315142526404<br>0375, 'optimizer':<br>'adam', 'epochs':<br>150, 'batch_size':<br>64, 'n_layers': 1,<br>'n_units_l0': 80,<br>'dropout_l0': 0.2}  | {'learning_rate':<br>0.002765878983990<br>4367, 'optimizer':<br>'adam', 'epochs': 250,<br>'batch_size': 160,<br>'n_layers': 1,<br>'n_units_l0': 60,<br>'dropout_l0': 0.2} |
| 01046X0010/<br>S1  | {'learning_rate':<br>0.0048710819863<br>5781, 'optimizer':<br>'adam', 'epochs':<br>250, 'batch_size':<br>48, 'n_layers': 1,<br>'n_units_l0': 50,<br>'dropout_l0': 0.2}      | {'learning_rate':<br>0.00924206212076<br>548, 'optimizer':<br>'adam', 'epochs':<br>200, 'batch_size':<br>48, 'n_layers': 1,<br>'n_units_l0': 90,<br>'dropout_l0': 0.2}   | {'learning_rate':<br>0.001300122762188<br>1476, 'optimizer':<br>'adam', 'epochs': 450,<br>'batch_size': 16,<br>'n_layers': 1,<br>'n_units_l0': 70,<br>'dropout_l0': 0.2}  |
| 01053X0058/<br>S1  | {'learning_rate':<br>0.0031514252640<br>40375, 'optimizer':<br>'adam', 'epochs':<br>150, 'batch_size':<br>64, 'n_layers': 1,<br>'n_units_l0': 80,<br>'dropout_l0': 0.2}     | {'learning_rate':<br>0.00100913266984<br>0099, 'optimizer':<br>'adam', 'epochs':<br>300, 'batch_size':<br>224, 'n_layers': 1,<br>'n_units_l0': 70,<br>'dropout_l0': 0.2} | {'learning_rate':<br>0.001009132669840<br>099, 'optimizer':<br>'adam', 'epochs': 300,<br>'batch_size': 224,<br>'n_layers': 1,<br>'n_units_l0': 70,<br>'dropout_l0': 0.2}  |
| 01074X0006/<br>S1  | {'learning_rate':<br>0.0031514252640<br>40375, 'optimizer':<br>'adam', 'epochs':<br>150, 'batch_size':<br>64, 'n_layers': 1,<br>'n_units_l0': 80,<br>'dropout_l0': 0.2}     | {'learning_rate':<br>0.00810305675553<br>2596, 'optimizer':<br>'adam', 'epochs':<br>200, 'batch_size':<br>32, 'n_layers': 1,<br>'n_units_l0': 40,<br>'dropout_l0': 0.2}  | {'learning_rate':<br>0.001300122762188<br>1476, 'optimizer':<br>'adam', 'epochs': 450,<br>'batch_size': 16,<br>'n_layers': 1,<br>'n_units_l0': 70,<br>'dropout_l0': 0.2}  |
| 01086X0011/<br>LS4 | {'learning_rate':<br>0.0035650145243<br>888115,<br>'optimizer': 'adam',<br>'epochs': 500,<br>'batch_size': 16,<br>'n_layers': 1,<br>'n_units_l0': 80,<br>'dropout_l0': 0.2} | {'learning_rate':<br>0.00881975370696<br>4301, 'optimizer':<br>'adam', 'epochs':<br>500, 'batch_size':<br>16, 'n_layers': 1,<br>'n_units_l0': 20,<br>'dropout_l0': 0.2}  | {'learning_rate':<br>0.008103056755532<br>596, 'optimizer':<br>'adam', 'epochs': 200,<br>'batch_size': 32,<br>'n_layers': 1,<br>'n_units_l0': 40,<br>'dropout_l0': 0.2}   |
| 01116X0138/<br>F1  | {'learning_rate':<br>0.0013001227621<br>881476,<br>'optimizer': 'adam',<br>'epochs': 450,<br>'batch_size': 16,<br>'n_layers': 1,<br>'n_units_l0': 70,<br>'dropout_l0': 0.2} | {'learning_rate':<br>0.00862528356964<br>4069, 'optimizer':<br>'adam', 'epochs':<br>400, 'batch_size':<br>64, 'n_layers': 1,<br>'n_units_l0': 40,<br>'dropout_l0': 0.2}  | {'learning_rate':<br>0.001848446353334<br>7947, 'optimizer':<br>'adam', 'epochs': 450,<br>'batch_size': 16,<br>'n_layers': 1,<br>'n_units_l0': 90,<br>'dropout_l0': 0.2}  |

|                   |                                                                                                                                                                          |                                                                                                                                                                          |                                                                                                                                                                           |
|-------------------|--------------------------------------------------------------------------------------------------------------------------------------------------------------------------|--------------------------------------------------------------------------------------------------------------------------------------------------------------------------|---------------------------------------------------------------------------------------------------------------------------------------------------------------------------|
| 01192X0043/<br>S1 | {'learning_rate':<br>0.0088197537069<br>64301, 'optimizer':<br>'adam', 'epochs':<br>500, 'batch_size':<br>16, 'n_layers': 1,<br>'n_units_l0': 20,<br>'dropout_l0': 0.2}  | {'learning_rate':<br>0.00650840966058<br>2904, 'optimizer':<br>'adam', 'epochs':<br>450, 'batch_size':<br>16, 'n_layers': 1,<br>'n_units_l0': 70,<br>'dropout_l0': 0.2}  | {'learning_rate':<br>0.008103056755532<br>596, 'optimizer':<br>'adam', 'epochs': 200,<br>'batch_size': 32,<br>'n_layers': 1,<br>'n_units_l0': 40,<br>'dropout_l0': 0.2}   |
| 01194X0069/<br>S1 | {'learning_rate':<br>0.0052693290249<br>71373, 'optimizer':<br>'adam', 'epochs':<br>150, 'batch_size':<br>240, 'n_layers': 1,<br>'n_units_l0': 80,<br>'dropout_l0': 0.2} | {'learning_rate':<br>0.00388655299576<br>36045, 'optimizer':<br>'adam', 'epochs':<br>400, 'batch_size':<br>48, 'n_layers': 1,<br>'n_units_l0': 50,<br>'dropout_l0': 0.2} | {'learning_rate':<br>0.001990509368817<br>8995, 'optimizer':<br>'adam', 'epochs': 300,<br>'batch_size': 64,<br>'n_layers': 1,<br>'n_units_l0': 100,<br>'dropout_l0': 0.2} |
| 01198X0002/<br>S1 | {'learning_rate':<br>0.0010091326698<br>40099, 'optimizer':<br>'adam', 'epochs':<br>300, 'batch_size':<br>224, 'n_layers': 1,<br>'n_units_l0': 70,<br>'dropout_l0': 0.2} | {'learning_rate':<br>0.00130012276218<br>81476, 'optimizer':<br>'adam', 'epochs':<br>450, 'batch_size':<br>16, 'n_layers': 1,<br>'n_units_l0': 70,<br>'dropout_l0': 0.2} | {'learning_rate':<br>0.002765878983990<br>4367, 'optimizer':<br>'adam', 'epochs': 250,<br>'batch_size': 160,<br>'n_layers': 1,<br>'n_units_l0': 60,<br>'dropout_l0': 0.2} |
| 01245X0010/<br>S1 | {'learning_rate':<br>0.0077352050213<br>22065, 'optimizer':<br>'adam', 'epochs':<br>200, 'batch_size':<br>16, 'n_layers': 1,<br>'n_units_l0': 40,<br>'dropout_l0': 0.2}  | {'learning_rate':<br>0.00315142526404<br>0375, 'optimizer':<br>'adam', 'epochs':<br>150, 'batch_size':<br>64, 'n_layers': 1,<br>'n_units_l0': 80,<br>'dropout_l0': 0.2}  | {'learning_rate':<br>0.001300122762188<br>1476, 'optimizer':<br>'adam', 'epochs': 450,<br>'batch_size': 16,<br>'n_layers': 1,<br>'n_units_l0': 70,<br>'dropout_l0': 0.2}  |
| 01252X0011/<br>S1 | {'learning_rate':<br>0.0078658948723<br>88346, 'optimizer':<br>'adam', 'epochs':<br>250, 'batch_size':<br>48, 'n_layers': 1,<br>'n_units_l0': 50,<br>'dropout_l0': 0.2}  | {'learning_rate':<br>0.00100913266984<br>0099, 'optimizer':<br>'adam', 'epochs':<br>300, 'batch_size':<br>224, 'n_layers': 1,<br>'n_units_l0': 70,<br>'dropout_l0': 0.2} | {'learning_rate':<br>0.001488662275444<br>4637, 'optimizer':<br>'adam', 'epochs': 150,<br>'batch_size': 48,<br>'n_layers': 1,<br>'n_units_l0': 50,<br>'dropout_l0': 0.2}  |
| 01258X0020/<br>S1 | {'learning_rate':<br>0.0031514252640<br>40375, 'optimizer':<br>'adam', 'epochs':<br>150, 'batch_size':<br>64, 'n_layers': 1,<br>'n_units_l0': 80,<br>'dropout_l0': 0.2}  | {'learning_rate':<br>0.00348774213479<br>9628, 'optimizer':<br>'adam', 'epochs':<br>100, 'batch_size':<br>96, 'n_layers': 1,<br>'n_units_l0': 70,<br>'dropout_l0': 0.2}  | {'learning_rate':<br>0.001300122762188<br>1476, 'optimizer':<br>'adam', 'epochs': 450,<br>'batch_size': 16,<br>'n_layers': 1,<br>'n_units_l0': 70,<br>'dropout_l0': 0.2}  |
| 01264X0029/<br>S1 | {'learning_rate':<br>0.0031514252640                                                                                                                                     | {'learning_rate':<br>0.00100913266984                                                                                                                                    | {'learning_rate':<br>0.002155693385282                                                                                                                                    |

|                |                                                                                                                                                    |                                                                                                                                                    |                                                                                                                                                     |
|----------------|----------------------------------------------------------------------------------------------------------------------------------------------------|----------------------------------------------------------------------------------------------------------------------------------------------------|-----------------------------------------------------------------------------------------------------------------------------------------------------|
|                | 40375, 'optimizer': 'adam', 'epochs': 150, 'batch_size': 64, 'n_layers': 1, 'n_units_l0': 80, 'dropout_l0': 0.2}                                   | 0099, 'optimizer': 'adam', 'epochs': 300, 'batch_size': 224, 'n_layers': 1, 'n_units_l0': 70, 'dropout_l0': 0.2}                                   | 5582, 'optimizer': 'adam', 'epochs': 500, 'batch_size': 96, 'n_layers': 1, 'n_units_l0': 100, 'dropout_l0': 0.2}                                    |
| 01287X0017/S1  | {'learning_rate': 0.008103056755532596, 'optimizer': 'adam', 'epochs': 200, 'batch_size': 32, 'n_layers': 1, 'n_units_l0': 40, 'dropout_l0': 0.2}  | {'learning_rate': 0.008103056755532596, 'optimizer': 'adam', 'epochs': 200, 'batch_size': 32, 'n_layers': 1, 'n_units_l0': 40, 'dropout_l0': 0.2}  | {'learning_rate': 0.0013001227621881476, 'optimizer': 'adam', 'epochs': 450, 'batch_size': 16, 'n_layers': 1, 'n_units_l0': 70, 'dropout_l0': 0.2}  |
| 01347X0002/S1  | {'learning_rate': 0.003151425264040375, 'optimizer': 'adam', 'epochs': 150, 'batch_size': 64, 'n_layers': 1, 'n_units_l0': 80, 'dropout_l0': 0.2}  | {'learning_rate': 0.008863787581270316, 'optimizer': 'adam', 'epochs': 200, 'batch_size': 64, 'n_layers': 1, 'n_units_l0': 90, 'dropout_l0': 0.2}  | {'learning_rate': 0.001009132669840099, 'optimizer': 'adam', 'epochs': 300, 'batch_size': 224, 'n_layers': 1, 'n_units_l0': 70, 'dropout_l0': 0.2}  |
| 01381X0070/P25 | {'learning_rate': 0.009774776777496903, 'optimizer': 'adam', 'epochs': 200, 'batch_size': 80, 'n_layers': 1, 'n_units_l0': 100, 'dropout_l0': 0.2} | {'learning_rate': 0.008759599404809302, 'optimizer': 'adam', 'epochs': 500, 'batch_size': 16, 'n_layers': 1, 'n_units_l0': 20, 'dropout_l0': 0.2}  | {'learning_rate': 0.0013001227621881476, 'optimizer': 'adam', 'epochs': 450, 'batch_size': 16, 'n_layers': 1, 'n_units_l0': 70, 'dropout_l0': 0.2}  |
| 01461X0012/S1  | {'learning_rate': 0.0013001227621881476, 'optimizer': 'adam', 'epochs': 450, 'batch_size': 16, 'n_layers': 1, 'n_units_l0': 70, 'dropout_l0': 0.2} | {'learning_rate': 0.0013001227621881476, 'optimizer': 'adam', 'epochs': 450, 'batch_size': 16, 'n_layers': 1, 'n_units_l0': 70, 'dropout_l0': 0.2} | {'learning_rate': 0.0019869077621547677, 'optimizer': 'adam', 'epochs': 300, 'batch_size': 64, 'n_layers': 1, 'n_units_l0': 100, 'dropout_l0': 0.2} |
| 01473X0087/S1  | {'learning_rate': 0.007630901178166286, 'optimizer': 'adam', 'epochs': 200, 'batch_size': 32, 'n_layers': 1, 'n_units_l0': 50, 'dropout_l0': 0.2}  | {'learning_rate': 0.005906369914893648, 'optimizer': 'adam', 'epochs': 50, 'batch_size': 176, 'n_layers': 1, 'n_units_l0': 80, 'dropout_l0': 0.2}  | {'learning_rate': 0.0019869077621547677, 'optimizer': 'adam', 'epochs': 300, 'batch_size': 64, 'n_layers': 1, 'n_units_l0': 100, 'dropout_l0': 0.2} |
| 01491X0009/S1  | {'learning_rate': 0.0059131273523082, 'optimizer':                                                                                                 | {'learning_rate': 0.001009132669840099, 'optimizer':                                                                                               | {'learning_rate': 0.0021556933852825582, 'optimizer':                                                                                               |



|                 |                                                                                                                                                    |                                                                                                                                                     |                                                                                                                                                    |
|-----------------|----------------------------------------------------------------------------------------------------------------------------------------------------|-----------------------------------------------------------------------------------------------------------------------------------------------------|----------------------------------------------------------------------------------------------------------------------------------------------------|
|                 | 'adam', 'epochs': 100, 'batch_size': 48, 'n_layers': 1, 'n_units_l0': 80, 'dropout_l0': 0.2}                                                       | 'adam', 'epochs': 300, 'batch_size': 224, 'n_layers': 1, 'n_units_l0': 70, 'dropout_l0': 0.2}                                                       | 'adam', 'epochs': 500, 'batch_size': 96, 'n_layers': 1, 'n_units_l0': 100, 'dropout_l0': 0.2}                                                      |
| 01516X0004/S1   | {'learning_rate': 0.007476627885185544, 'optimizer': 'adam', 'epochs': 100, 'batch_size': 32, 'n_layers': 1, 'n_units_l0': 90, 'dropout_l0': 0.2}  | {'learning_rate': 0.001009132669840099, 'optimizer': 'adam', 'epochs': 300, 'batch_size': 224, 'n_layers': 1, 'n_units_l0': 70, 'dropout_l0': 0.2}  | {'learning_rate': 0.006742941264953408, 'optimizer': 'adam', 'epochs': 300, 'batch_size': 64, 'n_layers': 1, 'n_units_l0': 20, 'dropout_l0': 0.2}  |
| 01584X0023/LV3  | {'learning_rate': 0.009707480295841904, 'optimizer': 'adam', 'epochs': 400, 'batch_size': 64, 'n_layers': 1, 'n_units_l0': 30, 'dropout_l0': 0.2}  | {'learning_rate': 0.008103056755532596, 'optimizer': 'adam', 'epochs': 200, 'batch_size': 32, 'n_layers': 1, 'n_units_l0': 40, 'dropout_l0': 0.2}   | {'learning_rate': 0.008091344208943023, 'optimizer': 'adam', 'epochs': 200, 'batch_size': 16, 'n_layers': 1, 'n_units_l0': 30, 'dropout_l0': 0.2}  |
| 01871X0031/S1   | {'learning_rate': 0.005269329024971373, 'optimizer': 'adam', 'epochs': 150, 'batch_size': 240, 'n_layers': 1, 'n_units_l0': 80, 'dropout_l0': 0.2} | {'learning_rate': 0.0027428312554128097, 'optimizer': 'adam', 'epochs': 400, 'batch_size': 128, 'n_layers': 1, 'n_units_l0': 40, 'dropout_l0': 0.2} | {'learning_rate': 0.001009132669840099, 'optimizer': 'adam', 'epochs': 300, 'batch_size': 224, 'n_layers': 1, 'n_units_l0': 70, 'dropout_l0': 0.2} |
| 01995X0012/342B | {'learning_rate': 0.003151425264040375, 'optimizer': 'adam', 'epochs': 150, 'batch_size': 64, 'n_layers': 1, 'n_units_l0': 80, 'dropout_l0': 0.2}  | {'learning_rate': 0.0019464388531750198, 'optimizer': 'adam', 'epochs': 250, 'batch_size': 224, 'n_layers': 1, 'n_units_l0': 80, 'dropout_l0': 0.2} | {'learning_rate': 0.001009132669840099, 'optimizer': 'adam', 'epochs': 300, 'batch_size': 224, 'n_layers': 1, 'n_units_l0': 70, 'dropout_l0': 0.2} |
| 02206X0022/S1   | {'learning_rate': 0.003151425264040375, 'optimizer': 'adam', 'epochs': 150, 'batch_size': 64, 'n_layers': 1, 'n_units_l0': 80, 'dropout_l0': 0.2}  | {'learning_rate': 0.005269329024971373, 'optimizer': 'adam', 'epochs': 150, 'batch_size': 240, 'n_layers': 1, 'n_units_l0': 80, 'dropout_l0': 0.2}  | {'learning_rate': 0.001009132669840099, 'optimizer': 'adam', 'epochs': 300, 'batch_size': 224, 'n_layers': 1, 'n_units_l0': 70, 'dropout_l0': 0.2} |
| 02225X0016/S1   | {'learning_rate': 0.0013001227621881476, 'optimizer': 'adam', 'epochs': 450,                                                                       | {'learning_rate': 0.0013001227621881476, 'optimizer': 'adam', 'epochs': 450, 'batch_size':                                                          | {'learning_rate': 0.008103056755532596, 'optimizer': 'adam', 'epochs': 200, 'batch_size': 32,                                                      |

|                    |                                                                                                                                                                          |                                                                                                                                                                          |                                                                                                                                                                           |
|--------------------|--------------------------------------------------------------------------------------------------------------------------------------------------------------------------|--------------------------------------------------------------------------------------------------------------------------------------------------------------------------|---------------------------------------------------------------------------------------------------------------------------------------------------------------------------|
|                    | 'batch_size': 16,<br>'n_layers': 1,<br>'n_units_l0': 70,<br>'dropout_l0': 0.2}                                                                                           | 16, 'n_layers': 1,<br>'n_units_l0': 70,<br>'dropout_l0': 0.2}                                                                                                            | 'n_layers': 1,<br>'n_units_l0': 40,<br>'dropout_l0': 0.2}                                                                                                                 |
| 02347X0022/<br>314 | {'learning_rate':<br>0.0031514252640<br>40375, 'optimizer':<br>'adam', 'epochs':<br>150, 'batch_size':<br>64, 'n_layers': 1,<br>'n_units_l0': 80,<br>'dropout_l0': 0.2}  | {'learning_rate':<br>0.00315142526404<br>0375, 'optimizer':<br>'adam', 'epochs':<br>150, 'batch_size':<br>64, 'n_layers': 1,<br>'n_units_l0': 80,<br>'dropout_l0': 0.2}  | {'learning_rate':<br>0.001986907762154<br>7677, 'optimizer':<br>'adam', 'epochs': 300,<br>'batch_size': 64,<br>'n_layers': 1,<br>'n_units_l0': 100,<br>'dropout_l0': 0.2} |
| 02566X0019/<br>S1  | {'learning_rate':<br>0.0081030567555<br>32596, 'optimizer':<br>'adam', 'epochs':<br>200, 'batch_size':<br>32, 'n_layers': 1,<br>'n_units_l0': 40,<br>'dropout_l0': 0.2}  | {'learning_rate':<br>0.00315142526404<br>0375, 'optimizer':<br>'adam', 'epochs':<br>150, 'batch_size':<br>64, 'n_layers': 1,<br>'n_units_l0': 80,<br>'dropout_l0': 0.2}  | {'learning_rate':<br>0.001009132669840<br>099, 'optimizer':<br>'adam', 'epochs': 300,<br>'batch_size': 224,<br>'n_layers': 1,<br>'n_units_l0': 70,<br>'dropout_l0': 0.2}  |
| 02617X0009/<br>S1  | {'learning_rate':<br>0.0092821560837<br>36918, 'optimizer':<br>'adam', 'epochs':<br>150, 'batch_size':<br>80, 'n_layers': 1,<br>'n_units_l0': 100,<br>'dropout_l0': 0.2} | {'learning_rate':<br>0.00250303532780<br>11654, 'optimizer':<br>'adam', 'epochs':<br>300, 'batch_size':<br>16, 'n_layers': 1,<br>'n_units_l0': 80,<br>'dropout_l0': 0.2} | {'learning_rate':<br>0.001300122762188<br>1476, 'optimizer':<br>'adam', 'epochs': 450,<br>'batch_size': 16,<br>'n_layers': 1,<br>'n_units_l0': 70,<br>'dropout_l0': 0.2}  |
| 02636X0009/<br>S1  | {'learning_rate':<br>0.0031514252640<br>40375, 'optimizer':<br>'adam', 'epochs':<br>150, 'batch_size':<br>64, 'n_layers': 1,<br>'n_units_l0': 80,<br>'dropout_l0': 0.2}  | {'learning_rate':<br>0.00526932902497<br>1373, 'optimizer':<br>'adam', 'epochs':<br>150, 'batch_size':<br>240, 'n_layers': 1,<br>'n_units_l0': 80,<br>'dropout_l0': 0.2} | {'learning_rate':<br>0.003151425264040<br>375, 'optimizer':<br>'adam', 'epochs': 150,<br>'batch_size': 64,<br>'n_layers': 1,<br>'n_units_l0': 80,<br>'dropout_l0': 0.2}   |
| 02726X0029/<br>238 | {'learning_rate':<br>0.0052693290249<br>71373, 'optimizer':<br>'adam', 'epochs':<br>150, 'batch_size':<br>240, 'n_layers': 1,<br>'n_units_l0': 80,<br>'dropout_l0': 0.2} | {'learning_rate':<br>0.00810305675553<br>2596, 'optimizer':<br>'adam', 'epochs':<br>200, 'batch_size':<br>32, 'n_layers': 1,<br>'n_units_l0': 40,<br>'dropout_l0': 0.2}  | {'learning_rate':<br>0.008103056755532<br>596, 'optimizer':<br>'adam', 'epochs': 200,<br>'batch_size': 32,<br>'n_layers': 1,<br>'n_units_l0': 40,<br>'dropout_l0': 0.2}   |
| 02923X0007/<br>F   | {'learning_rate':<br>0.0081030567555<br>32596, 'optimizer':<br>'adam', 'epochs':<br>200, 'batch_size':<br>32, 'n_layers': 1,                                             | {'learning_rate':<br>0.00193623655969<br>48302, 'optimizer':<br>'adam', 'epochs':<br>100, 'batch_size':<br>32, 'n_layers': 1,                                            | {'learning_rate':<br>0.001009132669840<br>099, 'optimizer':<br>'adam', 'epochs': 300,<br>'batch_size': 224,<br>'n_layers': 1,                                             |

|               |                                                                                                                                                    |                                                                                                                                                    |                                                                                                                                                     |
|---------------|----------------------------------------------------------------------------------------------------------------------------------------------------|----------------------------------------------------------------------------------------------------------------------------------------------------|-----------------------------------------------------------------------------------------------------------------------------------------------------|
|               | 'n_units_l0': 40, 'dropout_l0': 0.2}                                                                                                               | 'n_units_l0': 90, 'dropout_l0': 0.2}                                                                                                               | 'n_units_l0': 70, 'dropout_l0': 0.2}                                                                                                                |
| 02931X0008/S1 | {'learning_rate': 0.0059131273523082, 'optimizer': 'adam', 'epochs': 100, 'batch_size': 48, 'n_layers': 1, 'n_units_l0': 80, 'dropout_l0': 0.2}    | {'learning_rate': 0.003151425264040375, 'optimizer': 'adam', 'epochs': 150, 'batch_size': 64, 'n_layers': 1, 'n_units_l0': 80, 'dropout_l0': 0.2}  | {'learning_rate': 0.0027940569610945824, 'optimizer': 'adam', 'epochs': 150, 'batch_size': 176, 'n_layers': 1, 'n_units_l0': 80, 'dropout_l0': 0.2} |
| 02974X0004/S1 | {'learning_rate': 0.008103056755532596, 'optimizer': 'adam', 'epochs': 200, 'batch_size': 32, 'n_layers': 1, 'n_units_l0': 40, 'dropout_l0': 0.2}  | {'learning_rate': 0.005269329024971373, 'optimizer': 'adam', 'epochs': 150, 'batch_size': 240, 'n_layers': 1, 'n_units_l0': 80, 'dropout_l0': 0.2} | {'learning_rate': 0.008619339717805171, 'optimizer': 'adam', 'epochs': 500, 'batch_size': 16, 'n_layers': 1, 'n_units_l0': 20, 'dropout_l0': 0.2}   |
| 03272X0006/PZ | {'learning_rate': 0.006595550405089572, 'optimizer': 'adam', 'epochs': 350, 'batch_size': 48, 'n_layers': 1, 'n_units_l0': 100, 'dropout_l0': 0.2} | {'learning_rate': 0.003151425264040375, 'optimizer': 'adam', 'epochs': 150, 'batch_size': 64, 'n_layers': 1, 'n_units_l0': 80, 'dropout_l0': 0.2}  | {'learning_rate': 0.003151425264040375, 'optimizer': 'adam', 'epochs': 150, 'batch_size': 64, 'n_layers': 1, 'n_units_l0': 80, 'dropout_l0': 0.2}   |
| 03276X0009/P  | {'learning_rate': 0.008103056755532596, 'optimizer': 'adam', 'epochs': 200, 'batch_size': 32, 'n_layers': 1, 'n_units_l0': 40, 'dropout_l0': 0.2}  | {'learning_rate': 0.001009132669840099, 'optimizer': 'adam', 'epochs': 300, 'batch_size': 224, 'n_layers': 1, 'n_units_l0': 70, 'dropout_l0': 0.2} | {'learning_rate': 0.003151425264040375, 'optimizer': 'adam', 'epochs': 150, 'batch_size': 64, 'n_layers': 1, 'n_units_l0': 80, 'dropout_l0': 0.2}   |
| 03287X0018/S1 | {'learning_rate': 0.008103056755532596, 'optimizer': 'adam', 'epochs': 200, 'batch_size': 32, 'n_layers': 1, 'n_units_l0': 40, 'dropout_l0': 0.2}  | {'learning_rate': 0.008759599404809302, 'optimizer': 'adam', 'epochs': 500, 'batch_size': 16, 'n_layers': 1, 'n_units_l0': 20, 'dropout_l0': 0.2}  | {'learning_rate': 0.001559696717658343, 'optimizer': 'adam', 'epochs': 450, 'batch_size': 16, 'n_layers': 1, 'n_units_l0': 70, 'dropout_l0': 0.2}   |
| 03622X0027/PZ | {'learning_rate': 0.008103056755532596, 'optimizer': 'adam', 'epochs': 200, 'batch_size': 32, 'n_layers': 1, 'n_units_l0': 40, 'dropout_l0': 0.2}  | {'learning_rate': 0.003151425264040375, 'optimizer': 'adam', 'epochs': 150, 'batch_size': 64, 'n_layers': 1, 'n_units_l0': 80, 'dropout_l0': 0.2}  | {'learning_rate': 0.003151425264040375, 'optimizer': 'adam', 'epochs': 150, 'batch_size': 64, 'n_layers': 1, 'n_units_l0': 80, 'dropout_l0': 0.2}   |

|                       |                                                                                                                                                                             |                                                                                                                                                                           |                                                                                                                                                                           |
|-----------------------|-----------------------------------------------------------------------------------------------------------------------------------------------------------------------------|---------------------------------------------------------------------------------------------------------------------------------------------------------------------------|---------------------------------------------------------------------------------------------------------------------------------------------------------------------------|
| 04132X0086/<br>PP6    | {'learning_rate':<br>0.0097747767774<br>96903, 'optimizer':<br>'adam', 'epochs':<br>200, 'batch_size':<br>80, 'n_layers': 1,<br>'n_units_l0': 100,<br>'dropout_l0': 0.2}    | {'learning_rate':<br>0.00514309427673<br>1783, 'optimizer':<br>'adam', 'epochs':<br>400, 'batch_size':<br>160, 'n_layers': 1,<br>'n_units_l0': 100,<br>'dropout_l0': 0.2} | {'learning_rate':<br>0.002155693385282<br>5582, 'optimizer':<br>'adam', 'epochs': 500,<br>'batch_size': 96,<br>'n_layers': 1,<br>'n_units_l0': 100,<br>'dropout_l0': 0.2} |
| 04137X0018/<br>15     | {'learning_rate':<br>0.0031514252640<br>40375, 'optimizer':<br>'adam', 'epochs':<br>150, 'batch_size':<br>64, 'n_layers': 1,<br>'n_units_l0': 80,<br>'dropout_l0': 0.2}     | {'learning_rate':<br>0.00130012276218<br>81476, 'optimizer':<br>'adam', 'epochs':<br>450, 'batch_size':<br>16, 'n_layers': 1,<br>'n_units_l0': 70,<br>'dropout_l0': 0.2}  | {'learning_rate':<br>0.001300122762188<br>1476, 'optimizer':<br>'adam', 'epochs': 450,<br>'batch_size': 16,<br>'n_layers': 1,<br>'n_units_l0': 70,<br>'dropout_l0': 0.2}  |
| 04398X0002/<br>SONDAG | {'learning_rate':<br>0.0088197537069<br>64301, 'optimizer':<br>'adam', 'epochs':<br>500, 'batch_size':<br>16, 'n_layers': 1,<br>'n_units_l0': 20,<br>'dropout_l0': 0.2}     | {'learning_rate':<br>0.00286458605026<br>92654, 'optimizer':<br>'adam', 'epochs':<br>300, 'batch_size':<br>16, 'n_layers': 1,<br>'n_units_l0': 90,<br>'dropout_l0': 0.2}  | {'learning_rate':<br>0.007227642053055<br>42, 'optimizer':<br>'adam', 'epochs': 450,<br>'batch_size': 64,<br>'n_layers': 1,<br>'n_units_l0': 50,<br>'dropout_l0': 0.2}    |
| 04458X0023/<br>S3     | {'learning_rate':<br>0.0027940569610<br>945824,<br>'optimizer': 'adam',<br>'epochs': 150,<br>'batch_size': 16,<br>'n_layers': 1,<br>'n_units_l0': 90,<br>'dropout_l0': 0.2} | {'learning_rate':<br>0.00315142526404<br>0375, 'optimizer':<br>'adam', 'epochs':<br>150, 'batch_size':<br>64, 'n_layers': 1,<br>'n_units_l0': 80,<br>'dropout_l0': 0.2}   | {'learning_rate':<br>0.003151425264040<br>375, 'optimizer':<br>'adam', 'epochs': 150,<br>'batch_size': 64,<br>'n_layers': 1,<br>'n_units_l0': 80,<br>'dropout_l0': 0.2}   |
| 00061X0117/<br>PZ1    | {'learning_rate':<br>0.0097045383652<br>01885, 'optimizer':<br>'adam', 'epochs':<br>400, 'batch_size':<br>64, 'n_layers': 1,<br>'n_units_l0': 30,<br>'dropout_l0': 0.2}     | {'learning_rate':<br>0.00810305675553<br>2596, 'optimizer':<br>'adam', 'epochs':<br>200, 'batch_size':<br>32, 'n_layers': 1,<br>'n_units_l0': 40,<br>'dropout_l0': 0.2}   | {'learning_rate':<br>0.001300122762188<br>1476, 'optimizer':<br>'adam', 'epochs': 450,<br>'batch_size': 16,<br>'n_layers': 1,<br>'n_units_l0': 70,<br>'dropout_l0': 0.2}  |
| 00263X0129/<br>PZASA4 | {'learning_rate':<br>0.0071924740997<br>53512, 'optimizer':<br>'adam', 'epochs':<br>450, 'batch_size':<br>32, 'n_layers': 1,<br>'n_units_l0': 30,<br>'dropout_l0': 0.2}     | {'learning_rate':<br>0.00199776807603<br>72763, 'optimizer':<br>'adam', 'epochs':<br>300, 'batch_size':<br>16, 'n_layers': 1,<br>'n_units_l0': 80,<br>'dropout_l0': 0.2}  | {'learning_rate':<br>0.001563524077320<br>178, 'optimizer':<br>'adam', 'epochs': 500,<br>'batch_size': 16,<br>'n_layers': 1,<br>'n_units_l0': 90,<br>'dropout_l0': 0.2}   |

|                   |                                                                                                                                                                          |                                                                                                                                                                          |                                                                                                                                                                            |
|-------------------|--------------------------------------------------------------------------------------------------------------------------------------------------------------------------|--------------------------------------------------------------------------------------------------------------------------------------------------------------------------|----------------------------------------------------------------------------------------------------------------------------------------------------------------------------|
| 00275X0005/<br>P1 | {'learning_rate':<br>0.0093475920995<br>50283, 'optimizer':<br>'adam', 'epochs':<br>200, 'batch_size':<br>64, 'n_layers': 1,<br>'n_units_l0': 60,<br>'dropout_l0': 0.2}  | {'learning_rate':<br>0.00526932902497<br>1373, 'optimizer':<br>'adam', 'epochs':<br>150, 'batch_size':<br>240, 'n_layers': 1,<br>'n_units_l0': 80,<br>'dropout_l0': 0.2} | {'learning_rate':<br>0.001009132669840<br>099, 'optimizer':<br>'adam', 'epochs': 300,<br>'batch_size': 224,<br>'n_layers': 1,<br>'n_units_l0': 70,<br>'dropout_l0': 0.2}   |
| 00346X0011/<br>S1 | {'learning_rate':<br>0.0052693290249<br>71373, 'optimizer':<br>'adam', 'epochs':<br>150, 'batch_size':<br>240, 'n_layers': 1,<br>'n_units_l0': 80,<br>'dropout_l0': 0.2} | {'learning_rate':<br>0.00455759994126<br>212, 'optimizer':<br>'adam', 'epochs':<br>400, 'batch_size':<br>112, 'n_layers': 1,<br>'n_units_l0': 100,<br>'dropout_l0': 0.2} | {'learning_rate':<br>0.003824388422028<br>9666, 'optimizer':<br>'adam', 'epochs': 350,<br>'batch_size': 64,<br>'n_layers': 1,<br>'n_units_l0': 40,<br>'dropout_l0': 0.2}   |
| 00463X0036/<br>H1 | {'learning_rate':<br>0.0010091326698<br>40099, 'optimizer':<br>'adam', 'epochs':<br>300, 'batch_size':<br>224, 'n_layers': 1,<br>'n_units_l0': 70,<br>'dropout_l0': 0.2} | {'learning_rate':<br>0.00315142526404<br>0375, 'optimizer':<br>'adam', 'epochs':<br>150, 'batch_size':<br>64, 'n_layers': 1,<br>'n_units_l0': 80,<br>'dropout_l0': 0.2}  | {'learning_rate':<br>0.002221836274003<br>9905, 'optimizer':<br>'adam', 'epochs': 500,<br>'batch_size': 144,<br>'n_layers': 1,<br>'n_units_l0': 100,<br>'dropout_l0': 0.2} |
| 02603X0009/<br>S1 | {'learning_rate':<br>0.0031514252640<br>40375, 'optimizer':<br>'adam', 'epochs':<br>150, 'batch_size':<br>64, 'n_layers': 1,<br>'n_units_l0': 80,<br>'dropout_l0': 0.2}  | {'learning_rate':<br>0.00315142526404<br>0375, 'optimizer':<br>'adam', 'epochs':<br>150, 'batch_size':<br>64, 'n_layers': 1,<br>'n_units_l0': 80,<br>'dropout_l0': 0.2}  | {'learning_rate':<br>0.001009132669840<br>099, 'optimizer':<br>'adam', 'epochs': 300,<br>'batch_size': 224,<br>'n_layers': 1,<br>'n_units_l0': 70,<br>'dropout_l0': 0.2}   |

Table S4: Best hyperparameters for all wavelet models in single station approach

| Code                | Best Params GRU                                                                                                                                                         | Best Params LSTM                                                                                                                                                         | Best Params BILSTM                                                                                                                                                       |
|---------------------|-------------------------------------------------------------------------------------------------------------------------------------------------------------------------|--------------------------------------------------------------------------------------------------------------------------------------------------------------------------|--------------------------------------------------------------------------------------------------------------------------------------------------------------------------|
| 00068X0010/<br>F295 | {'learning_rate':<br>0.0031514252640<br>40375, 'optimizer':<br>'adam', 'epochs':<br>150, 'batch_size':<br>64, 'n_layers': 1,<br>'n_units_l0': 80,<br>'dropout_l0': 0.2} | {'learning_rate':<br>0.001009132669840<br>099, 'optimizer':<br>'adam', 'epochs':<br>300, 'batch_size':<br>224, 'n_layers': 1,<br>'n_units_l0': 70,<br>'dropout_l0': 0.2} | {'learning_rate':<br>0.004470922913421<br>275, 'optimizer':<br>'adam', 'epochs': 350,<br>'batch_size': 208,<br>'n_layers': 1,<br>'n_units_l0': 60,<br>'dropout_l0': 0.2} |

|                       |                                                                                                                                                                         |                                                                                                                                                                          |                                                                                                                                                                          |
|-----------------------|-------------------------------------------------------------------------------------------------------------------------------------------------------------------------|--------------------------------------------------------------------------------------------------------------------------------------------------------------------------|--------------------------------------------------------------------------------------------------------------------------------------------------------------------------|
| 00182X0010/<br>P1     | {'learning_rate':<br>0.0095344032189<br>46923, 'optimizer':<br>'adam', 'epochs':<br>150, 'batch_size':<br>64, 'n_layers': 1,<br>'n_units_l0': 40,<br>'dropout_l0': 0.2} | {'learning_rate':<br>0.008103056755532<br>596, 'optimizer':<br>'adam', 'epochs':<br>200, 'batch_size': 32,<br>'n_layers': 1,<br>'n_units_l0': 40,<br>'dropout_l0': 0.2}  | {'learning_rate':<br>0.006595199234314<br>37, 'optimizer':<br>'adam', 'epochs': 350,<br>'batch_size': 112,<br>'n_layers': 1,<br>'n_units_l0': 100,<br>'dropout_l0': 0.2} |
| 00241X0012/<br>P1     | {'learning_rate':<br>0.0070966206604<br>84497, 'optimizer':<br>'adam', 'epochs':<br>200, 'batch_size':<br>80, 'n_layers': 1,<br>'n_units_l0': 90,<br>'dropout_l0': 0.2} | {'learning_rate':<br>0.004470922913421<br>275, 'optimizer':<br>'adam', 'epochs':<br>350, 'batch_size':<br>208, 'n_layers': 1,<br>'n_units_l0': 60,<br>'dropout_l0': 0.2} | {'learning_rate':<br>0.006875829206466<br>048, 'optimizer':<br>'adam', 'epochs': 400,<br>'batch_size': 112,<br>'n_layers': 1,<br>'n_units_l0': 90,<br>'dropout_l0': 0.2} |
| 00263X0006/<br>P1     | {'learning_rate':<br>0.0031514252640<br>40375, 'optimizer':<br>'adam', 'epochs':<br>150, 'batch_size':<br>64, 'n_layers': 1,<br>'n_units_l0': 80,<br>'dropout_l0': 0.2} | {'learning_rate':<br>0.008103056755532<br>596, 'optimizer':<br>'adam', 'epochs':<br>200, 'batch_size': 32,<br>'n_layers': 1,<br>'n_units_l0': 40,<br>'dropout_l0': 0.2}  | {'learning_rate':<br>0.006389829936455<br>146, 'optimizer':<br>'adam', 'epochs': 250,<br>'batch_size': 96,<br>'n_layers': 1,<br>'n_units_l0': 80,<br>'dropout_l0': 0.2}  |
| 00271X0002/<br>P2     | {'learning_rate':<br>0.0095344032189<br>46923, 'optimizer':<br>'adam', 'epochs':<br>150, 'batch_size':<br>64, 'n_layers': 1,<br>'n_units_l0': 40,<br>'dropout_l0': 0.2} | {'learning_rate':<br>0.003151425264040<br>375, 'optimizer':<br>'adam', 'epochs':<br>150, 'batch_size': 64,<br>'n_layers': 1,<br>'n_units_l0': 80,<br>'dropout_l0': 0.2}  | {'learning_rate':<br>0.009469968207464<br>9, 'optimizer': 'adam',<br>'epochs': 500,<br>'batch_size': 128,<br>'n_layers': 1,<br>'n_units_l0': 50,<br>'dropout_l0': 0.2}   |
| 00332X0007/<br>S1     | {'learning_rate':<br>0.0081030567555<br>32596, 'optimizer':<br>'adam', 'epochs':<br>200, 'batch_size':<br>32, 'n_layers': 1,<br>'n_units_l0': 40,<br>'dropout_l0': 0.2} | {'learning_rate':<br>0.005269329024971<br>373, 'optimizer':<br>'adam', 'epochs':<br>150, 'batch_size':<br>240, 'n_layers': 1,<br>'n_units_l0': 80,<br>'dropout_l0': 0.2} | {'learning_rate':<br>0.007224044366448<br>904, 'optimizer':<br>'adam', 'epochs': 350,<br>'batch_size': 208,<br>'n_layers': 1,<br>'n_units_l0': 90,<br>'dropout_l0': 0.2} |
| 00471X0095/<br>PZ2013 | {'learning_rate':<br>0.0087950557776<br>15794, 'optimizer':<br>'adam', 'epochs':<br>200, 'batch_size':<br>64, 'n_layers': 1,<br>'n_units_l0': 90,<br>'dropout_l0': 0.2} | {'learning_rate':<br>0.005269329024971<br>373, 'optimizer':<br>'adam', 'epochs':<br>150, 'batch_size':<br>240, 'n_layers': 1,<br>'n_units_l0': 80,<br>'dropout_l0': 0.2} | {'learning_rate':<br>0.006040973157822<br>555, 'optimizer':<br>'adam', 'epochs': 350,<br>'batch_size': 208,<br>'n_layers': 1,<br>'n_units_l0': 80,<br>'dropout_l0': 0.2} |
| 00572X0010/<br>S1     | {'learning_rate':<br>0.0074956599352                                                                                                                                    | {'learning_rate':<br>0.001009132669840                                                                                                                                   | {'learning_rate':<br>0.005269329024971                                                                                                                                   |

|               |                                                                                                                                                    |                                                                                                                                                     |                                                                                                                                                    |
|---------------|----------------------------------------------------------------------------------------------------------------------------------------------------|-----------------------------------------------------------------------------------------------------------------------------------------------------|----------------------------------------------------------------------------------------------------------------------------------------------------|
|               | 95373, 'optimizer': 'adam', 'epochs': 400, 'batch_size': 112, 'n_layers': 1, 'n_units_l0': 100, 'dropout_l0': 0.2}                                 | 099, 'optimizer': 'adam', 'epochs': 300, 'batch_size': 224, 'n_layers': 1, 'n_units_l0': 70, 'dropout_l0': 0.2}                                     | 373, 'optimizer': 'adam', 'epochs': 150, 'batch_size': 240, 'n_layers': 1, 'n_units_l0': 80, 'dropout_l0': 0.2}                                    |
| 00578X0002/S1 | {'learning_rate': 0.001009132669840099, 'optimizer': 'adam', 'epochs': 300, 'batch_size': 224, 'n_layers': 1, 'n_units_l0': 70, 'dropout_l0': 0.2} | {'learning_rate': 0.007045962219824817, 'optimizer': 'adam', 'epochs': 400, 'batch_size': 96, 'n_layers': 1, 'n_units_l0': 80, 'dropout_l0': 0.2}   | {'learning_rate': 0.004470922913421275, 'optimizer': 'adam', 'epochs': 350, 'batch_size': 208, 'n_layers': 1, 'n_units_l0': 60, 'dropout_l0': 0.2} |
| 00583X0005/S1 | {'learning_rate': 0.00995265220245213, 'optimizer': 'adam', 'epochs': 350, 'batch_size': 48, 'n_layers': 1, 'n_units_l0': 50, 'dropout_l0': 0.2}   | {'learning_rate': 0.004470922913421275, 'optimizer': 'adam', 'epochs': 350, 'batch_size': 208, 'n_layers': 1, 'n_units_l0': 60, 'dropout_l0': 0.2}  | {'learning_rate': 0.004470922913421275, 'optimizer': 'adam', 'epochs': 350, 'batch_size': 208, 'n_layers': 1, 'n_units_l0': 60, 'dropout_l0': 0.2} |
| 00608X0028/S1 | {'learning_rate': 0.009783853471961944, 'optimizer': 'adam', 'epochs': 300, 'batch_size': 32, 'n_layers': 1, 'n_units_l0': 50, 'dropout_l0': 0.2}  | {'learning_rate': 0.004470922913421275, 'optimizer': 'adam', 'epochs': 350, 'batch_size': 208, 'n_layers': 1, 'n_units_l0': 60, 'dropout_l0': 0.2}  | {'learning_rate': 0.004470922913421275, 'optimizer': 'adam', 'epochs': 350, 'batch_size': 208, 'n_layers': 1, 'n_units_l0': 60, 'dropout_l0': 0.2} |
| 00671X0052/S1 | {'learning_rate': 0.009873018120325887, 'optimizer': 'adam', 'epochs': 200, 'batch_size': 64, 'n_layers': 1, 'n_units_l0': 30, 'dropout_l0': 0.2}  | {'learning_rate': 0.0013001227621881476, 'optimizer': 'adam', 'epochs': 450, 'batch_size': 16, 'n_layers': 1, 'n_units_l0': 70, 'dropout_l0': 0.2}  | {'learning_rate': 0.004338726506305758, 'optimizer': 'adam', 'epochs': 350, 'batch_size': 208, 'n_layers': 1, 'n_units_l0': 80, 'dropout_l0': 0.2} |
| 00755X0006/S1 | {'learning_rate': 0.005269329024971373, 'optimizer': 'adam', 'epochs': 150, 'batch_size': 240, 'n_layers': 1, 'n_units_l0': 80, 'dropout_l0': 0.2} | {'learning_rate': 0.0077647231782143064, 'optimizer': 'adam', 'epochs': 400, 'batch_size': 112, 'n_layers': 1, 'n_units_l0': 50, 'dropout_l0': 0.2} | {'learning_rate': 0.001009132669840099, 'optimizer': 'adam', 'epochs': 300, 'batch_size': 224, 'n_layers': 1, 'n_units_l0': 70, 'dropout_l0': 0.2} |
| 00766X0004/S1 | {'learning_rate': 0.005269329024971373, 'optimizer': 'adam', 'epochs': 150, 'batch_size': 240, 'n_layers': 1, 'n_units_l0': 80, 'dropout_l0': 0.2} | {'learning_rate': 0.001009132669840099, 'optimizer': 'adam', 'epochs': 300, 'batch_size': 224, 'n_layers': 1, 'n_units_l0': 70, 'dropout_l0': 0.2}  | {'learning_rate': 0.004470922913421275, 'optimizer': 'adam', 'epochs': 350, 'batch_size': 208, 'n_layers': 1, 'n_units_l0': 60, 'dropout_l0': 0.2} |

|                  |                                                                                                                                                    |                                                                                                                                                     |                                                                                                                                                    |
|------------------|----------------------------------------------------------------------------------------------------------------------------------------------------|-----------------------------------------------------------------------------------------------------------------------------------------------------|----------------------------------------------------------------------------------------------------------------------------------------------------|
|                  | 150, 'batch_size': 240, 'n_layers': 1, 'n_units_l0': 80, 'dropout_l0': 0.2}                                                                        | 300, 'batch_size': 224, 'n_layers': 1, 'n_units_l0': 70, 'dropout_l0': 0.2}                                                                         | 'batch_size': 208, 'n_layers': 1, 'n_units_l0': 60, 'dropout_l0': 0.2}                                                                             |
| 00773X0002/S1    | {'learning_rate': 0.003151425264040375, 'optimizer': 'adam', 'epochs': 150, 'batch_size': 64, 'n_layers': 1, 'n_units_l0': 80, 'dropout_l0': 0.2}  | {'learning_rate': 0.005269329024971373, 'optimizer': 'adam', 'epochs': 150, 'batch_size': 240, 'n_layers': 1, 'n_units_l0': 80, 'dropout_l0': 0.2}  | {'learning_rate': 0.004470922913421275, 'optimizer': 'adam', 'epochs': 350, 'batch_size': 208, 'n_layers': 1, 'n_units_l0': 60, 'dropout_l0': 0.2} |
| 00791X0017/S1    | {'learning_rate': 0.00995265220245213, 'optimizer': 'adam', 'epochs': 350, 'batch_size': 48, 'n_layers': 1, 'n_units_l0': 50, 'dropout_l0': 0.2}   | {'learning_rate': 0.008625283569644069, 'optimizer': 'adam', 'epochs': 400, 'batch_size': 64, 'n_layers': 1, 'n_units_l0': 40, 'dropout_l0': 0.2}   | {'learning_rate': 0.001009132669840099, 'optimizer': 'adam', 'epochs': 300, 'batch_size': 224, 'n_layers': 1, 'n_units_l0': 70, 'dropout_l0': 0.2} |
| 00794X0021/S1    | {'learning_rate': 0.004470922913421275, 'optimizer': 'adam', 'epochs': 350, 'batch_size': 208, 'n_layers': 1, 'n_units_l0': 60, 'dropout_l0': 0.2} | {'learning_rate': 0.0031469235943392057, 'optimizer': 'adam', 'epochs': 350, 'batch_size': 208, 'n_layers': 1, 'n_units_l0': 70, 'dropout_l0': 0.2} | {'learning_rate': 0.001009132669840099, 'optimizer': 'adam', 'epochs': 300, 'batch_size': 224, 'n_layers': 1, 'n_units_l0': 70, 'dropout_l0': 0.2} |
| 00805X0002/S1    | {'learning_rate': 0.003151425264040375, 'optimizer': 'adam', 'epochs': 150, 'batch_size': 64, 'n_layers': 1, 'n_units_l0': 80, 'dropout_l0': 0.2}  | {'learning_rate': 0.00455759994126212, 'optimizer': 'adam', 'epochs': 400, 'batch_size': 112, 'n_layers': 1, 'n_units_l0': 100, 'dropout_l0': 0.2}  | {'learning_rate': 0.001009132669840099, 'optimizer': 'adam', 'epochs': 300, 'batch_size': 224, 'n_layers': 1, 'n_units_l0': 70, 'dropout_l0': 0.2} |
| 00817X0145/PZ_SN | {'learning_rate': 0.007096620660484497, 'optimizer': 'adam', 'epochs': 200, 'batch_size': 80, 'n_layers': 1, 'n_units_l0': 90, 'dropout_l0': 0.2}  | {'learning_rate': 0.008596635502376394, 'optimizer': 'adam', 'epochs': 450, 'batch_size': 160, 'n_layers': 1, 'n_units_l0': 70, 'dropout_l0': 0.2}  | {'learning_rate': 0.006086547336704553, 'optimizer': 'adam', 'epochs': 250, 'batch_size': 208, 'n_layers': 1, 'n_units_l0': 80, 'dropout_l0': 0.2} |
| 00821X0035/S1    | {'learning_rate': 0.009498471575558025, 'optimizer': 'adam', 'epochs': 450, 'batch_size': 112, 'n_layers': 1,                                      | {'learning_rate': 0.0013001227621881476, 'optimizer': 'adam', 'epochs': 450, 'batch_size': 16, 'n_layers': 1,                                       | {'learning_rate': 0.006935572081797071, 'optimizer': 'adam', 'epochs': 500, 'batch_size': 208, 'n_layers': 1,                                      |



|                   |                                                                                                                                                    |                                                                                                                                                      |                                                                                                                                                    |
|-------------------|----------------------------------------------------------------------------------------------------------------------------------------------------|------------------------------------------------------------------------------------------------------------------------------------------------------|----------------------------------------------------------------------------------------------------------------------------------------------------|
|                   | 'n_units_l0': 80, 'dropout_l0': 0.2}                                                                                                               | 'n_units_l0': 70, 'dropout_l0': 0.2}                                                                                                                 | 'n_units_l0': 90, 'dropout_l0': 0.2}                                                                                                               |
| 00847X0043/S1     | {'learning_rate': 0.005269329024971373, 'optimizer': 'adam', 'epochs': 150, 'batch_size': 240, 'n_layers': 1, 'n_units_l0': 80, 'dropout_l0': 0.2} | {'learning_rate': 0.009751298348816691, 'optimizer': 'adam', 'epochs': 300, 'batch_size': 112, 'n_layers': 1, 'n_units_l0': 40, 'dropout_l0': 0.2}   | {'learning_rate': 0.003151425264040375, 'optimizer': 'adam', 'epochs': 150, 'batch_size': 64, 'n_layers': 1, 'n_units_l0': 80, 'dropout_l0': 0.2}  |
| 00853X0030/PZ2013 | {'learning_rate': 0.005269329024971373, 'optimizer': 'adam', 'epochs': 150, 'batch_size': 240, 'n_layers': 1, 'n_units_l0': 80, 'dropout_l0': 0.2} | {'learning_rate': 0.0045187028488219705, 'optimizer': 'adam', 'epochs': 350, 'batch_size': 128, 'n_layers': 1, 'n_units_l0': 100, 'dropout_l0': 0.2} | {'learning_rate': 0.008644529555669741, 'optimizer': 'adam', 'epochs': 200, 'batch_size': 224, 'n_layers': 1, 'n_units_l0': 90, 'dropout_l0': 0.2} |
| 00862X0005/S1     | {'learning_rate': 0.004969445949093749, 'optimizer': 'adam', 'epochs': 250, 'batch_size': 64, 'n_layers': 1, 'n_units_l0': 70, 'dropout_l0': 0.2}  | {'learning_rate': 0.007906626615390122, 'optimizer': 'adam', 'epochs': 350, 'batch_size': 80, 'n_layers': 1, 'n_units_l0': 100, 'dropout_l0': 0.2}   | {'learning_rate': 0.006565484501923348, 'optimizer': 'adam', 'epochs': 500, 'batch_size': 32, 'n_layers': 1, 'n_units_l0': 40, 'dropout_l0': 0.2}  |
| 00957X0005/S1     | {'learning_rate': 0.001877203523325561, 'optimizer': 'adam', 'epochs': 450, 'batch_size': 16, 'n_layers': 1, 'n_units_l0': 40, 'dropout_l0': 0.2}  | {'learning_rate': 0.007214354848482611, 'optimizer': 'adam', 'epochs': 450, 'batch_size': 144, 'n_layers': 1, 'n_units_l0': 50, 'dropout_l0': 0.2}   | {'learning_rate': 0.008103056755532596, 'optimizer': 'adam', 'epochs': 200, 'batch_size': 32, 'n_layers': 1, 'n_units_l0': 40, 'dropout_l0': 0.2}  |
| 00993X0002/S1     | {'learning_rate': 0.004470922913421275, 'optimizer': 'adam', 'epochs': 350, 'batch_size': 208, 'n_layers': 1, 'n_units_l0': 60, 'dropout_l0': 0.2} | {'learning_rate': 0.001009132669840099, 'optimizer': 'adam', 'epochs': 300, 'batch_size': 224, 'n_layers': 1, 'n_units_l0': 70, 'dropout_l0': 0.2}   | {'learning_rate': 0.004470922913421275, 'optimizer': 'adam', 'epochs': 350, 'batch_size': 208, 'n_layers': 1, 'n_units_l0': 60, 'dropout_l0': 0.2} |
| 01003X0008/S1     | {'learning_rate': 0.009245886088352598, 'optimizer': 'adam', 'epochs': 200, 'batch_size': 64, 'n_layers': 1, 'n_units_l0': 30, 'dropout_l0': 0.2}  | {'learning_rate': 0.006689047421574244, 'optimizer': 'adam', 'epochs': 200, 'batch_size': 224, 'n_layers': 1, 'n_units_l0': 90, 'dropout_l0': 0.2}   | {'learning_rate': 0.001009132669840099, 'optimizer': 'adam', 'epochs': 300, 'batch_size': 224, 'n_layers': 1, 'n_units_l0': 70, 'dropout_l0': 0.2} |

|                   |                                                                                                                                                                           |                                                                                                                                                                           |                                                                                                                                                                           |
|-------------------|---------------------------------------------------------------------------------------------------------------------------------------------------------------------------|---------------------------------------------------------------------------------------------------------------------------------------------------------------------------|---------------------------------------------------------------------------------------------------------------------------------------------------------------------------|
| 01013X0004/<br>S1 | {'learning_rate':<br>0.0091564675275<br>1386, 'optimizer':<br>'adam', 'epochs':<br>250, 'batch_size':<br>80, 'n_layers': 1,<br>'n_units_l0': 90,<br>'dropout_l0': 0.2}    | {'learning_rate':<br>0.004470922913421<br>275, 'optimizer':<br>'adam', 'epochs':<br>350, 'batch_size':<br>208, 'n_layers': 1,<br>'n_units_l0': 60,<br>'dropout_l0': 0.2}  | {'learning_rate':<br>0.006834533542513<br>314, 'optimizer':<br>'adam', 'epochs': 300,<br>'batch_size': 224,<br>'n_layers': 1,<br>'n_units_l0': 90,<br>'dropout_l0': 0.2}  |
| 01024X0058/<br>S1 | {'learning_rate':<br>0.0081030567555<br>32596, 'optimizer':<br>'adam', 'epochs':<br>200, 'batch_size':<br>32, 'n_layers': 1,<br>'n_units_l0': 40,<br>'dropout_l0': 0.2}   | {'learning_rate':<br>0.004470922913421<br>275, 'optimizer':<br>'adam', 'epochs':<br>350, 'batch_size':<br>208, 'n_layers': 1,<br>'n_units_l0': 60,<br>'dropout_l0': 0.2}  | {'learning_rate':<br>0.007224044366448<br>904, 'optimizer':<br>'adam', 'epochs': 350,<br>'batch_size': 208,<br>'n_layers': 1,<br>'n_units_l0': 90,<br>'dropout_l0': 0.2}  |
| 01031X0023/<br>S1 | {'learning_rate':<br>0.0051614275817<br>75894, 'optimizer':<br>'adam', 'epochs':<br>350, 'batch_size':<br>224, 'n_layers': 1,<br>'n_units_l0': 40,<br>'dropout_l0': 0.2}  | {'learning_rate':<br>0.003826914287802<br>6804, 'optimizer':<br>'adam', 'epochs':<br>150, 'batch_size': 48,<br>'n_layers': 1,<br>'n_units_l0': 50,<br>'dropout_l0': 0.2}  | {'learning_rate':<br>0.006086547336704<br>553, 'optimizer':<br>'adam', 'epochs': 250,<br>'batch_size': 208,<br>'n_layers': 1,<br>'n_units_l0': 80,<br>'dropout_l0': 0.2}  |
| 01045X0015/<br>S1 | {'learning_rate':<br>0.0031514252640<br>40375, 'optimizer':<br>'adam', 'epochs':<br>150, 'batch_size':<br>64, 'n_layers': 1,<br>'n_units_l0': 80,<br>'dropout_l0': 0.2}   | {'learning_rate':<br>0.007415485936681<br>335, 'optimizer':<br>'adam', 'epochs':<br>250, 'batch_size':<br>224, 'n_layers': 1,<br>'n_units_l0': 80,<br>'dropout_l0': 0.2}  | {'learning_rate':<br>0.001009132669840<br>099, 'optimizer':<br>'adam', 'epochs': 300,<br>'batch_size': 224,<br>'n_layers': 1,<br>'n_units_l0': 70,<br>'dropout_l0': 0.2}  |
| 01046X0010/<br>S1 | {'learning_rate':<br>0.0095344032189<br>46923, 'optimizer':<br>'adam', 'epochs':<br>150, 'batch_size':<br>64, 'n_layers': 1,<br>'n_units_l0': 40,<br>'dropout_l0': 0.2}   | {'learning_rate':<br>0.003151425264040<br>375, 'optimizer':<br>'adam', 'epochs':<br>150, 'batch_size': 64,<br>'n_layers': 1,<br>'n_units_l0': 80,<br>'dropout_l0': 0.2}   | {'learning_rate':<br>0.006086547336704<br>553, 'optimizer':<br>'adam', 'epochs': 250,<br>'batch_size': 208,<br>'n_layers': 1,<br>'n_units_l0': 80,<br>'dropout_l0': 0.2}  |
| 01053X0058/<br>S1 | {'learning_rate':<br>0.0092821560837<br>36918, 'optimizer':<br>'adam', 'epochs':<br>500, 'batch_size':<br>224, 'n_layers': 1,<br>'n_units_l0': 100,<br>'dropout_l0': 0.2} | {'learning_rate':<br>0.002155693385282<br>5582, 'optimizer':<br>'adam', 'epochs':<br>500, 'batch_size': 96,<br>'n_layers': 1,<br>'n_units_l0': 100,<br>'dropout_l0': 0.2} | {'learning_rate':<br>0.002500314424817<br>318, 'optimizer':<br>'adam', 'epochs': 250,<br>'batch_size': 112,<br>'n_layers': 1,<br>'n_units_l0': 100,<br>'dropout_l0': 0.2} |
| 01074X0006/<br>S1 | {'learning_rate':<br>0.0081030567555                                                                                                                                      | {'learning_rate':<br>0.007630901178166                                                                                                                                    | {'learning_rate':<br>0.001300122762188                                                                                                                                    |

|                    |                                                                                                                                                   |                                                                                                                                                    |                                                                                                                                                    |
|--------------------|---------------------------------------------------------------------------------------------------------------------------------------------------|----------------------------------------------------------------------------------------------------------------------------------------------------|----------------------------------------------------------------------------------------------------------------------------------------------------|
|                    | 32596, 'optimizer': 'adam', 'epochs': 200, 'batch_size': 32, 'n_layers': 1, 'n_units_l0': 40, 'dropout_l0': 0.2}                                  | 286, 'optimizer': 'adam', 'epochs': 350, 'batch_size': 32, 'n_layers': 1, 'n_units_l0': 50, 'dropout_l0': 0.2}                                     | 1476, 'optimizer': 'adam', 'epochs': 450, 'batch_size': 16, 'n_layers': 1, 'n_units_l0': 70, 'dropout_l0': 0.2}                                    |
| 01086X0011/<br>LS4 | {'learning_rate': 0.0097045383652, 'optimizer': 'adam', 'epochs': 400, 'batch_size': 64, 'n_layers': 1, 'n_units_l0': 30, 'dropout_l0': 0.2}      | {'learning_rate': 0.001300122762188, 'optimizer': 'adam', 'epochs': 450, 'batch_size': 16, 'n_layers': 1, 'n_units_l0': 70, 'dropout_l0': 0.2}     | {'learning_rate': 0.008103056755532, 'optimizer': 'adam', 'epochs': 200, 'batch_size': 32, 'n_layers': 1, 'n_units_l0': 40, 'dropout_l0': 0.2}     |
| 01116X0138/<br>F1  | {'learning_rate': 0.009707480295841904, 'optimizer': 'adam', 'epochs': 400, 'batch_size': 64, 'n_layers': 1, 'n_units_l0': 30, 'dropout_l0': 0.2} | {'learning_rate': 0.009472945579003304, 'optimizer': 'adam', 'epochs': 350, 'batch_size': 64, 'n_layers': 1, 'n_units_l0': 60, 'dropout_l0': 0.2}  | {'learning_rate': 0.004470922913421275, 'optimizer': 'adam', 'epochs': 350, 'batch_size': 208, 'n_layers': 1, 'n_units_l0': 60, 'dropout_l0': 0.2} |
| 01192X0043/<br>S1  | {'learning_rate': 0.008759599404809302, 'optimizer': 'adam', 'epochs': 500, 'batch_size': 16, 'n_layers': 1, 'n_units_l0': 20, 'dropout_l0': 0.2} | {'learning_rate': 0.005264284135366972, 'optimizer': 'adam', 'epochs': 350, 'batch_size': 16, 'n_layers': 1, 'n_units_l0': 30, 'dropout_l0': 0.2}  | {'learning_rate': 0.009907298163988354, 'optimizer': 'adam', 'epochs': 200, 'batch_size': 16, 'n_layers': 1, 'n_units_l0': 40, 'dropout_l0': 0.2}  |
| 01194X0069/<br>S1  | {'learning_rate': 0.004969445949093749, 'optimizer': 'adam', 'epochs': 250, 'batch_size': 64, 'n_layers': 1, 'n_units_l0': 70, 'dropout_l0': 0.2} | {'learning_rate': 0.005269329024971373, 'optimizer': 'adam', 'epochs': 150, 'batch_size': 240, 'n_layers': 1, 'n_units_l0': 80, 'dropout_l0': 0.2} | {'learning_rate': 0.006086547336704553, 'optimizer': 'adam', 'epochs': 250, 'batch_size': 208, 'n_layers': 1, 'n_units_l0': 80, 'dropout_l0': 0.2} |
| 01198X0002/<br>S1  | {'learning_rate': 0.008103056755532596, 'optimizer': 'adam', 'epochs': 200, 'batch_size': 32, 'n_layers': 1, 'n_units_l0': 40, 'dropout_l0': 0.2} | {'learning_rate': 0.004470922913421275, 'optimizer': 'adam', 'epochs': 350, 'batch_size': 208, 'n_layers': 1, 'n_units_l0': 60, 'dropout_l0': 0.2} | {'learning_rate': 0.004470922913421275, 'optimizer': 'adam', 'epochs': 350, 'batch_size': 208, 'n_layers': 1, 'n_units_l0': 60, 'dropout_l0': 0.2} |
| 01245X0010/<br>S1  | {'learning_rate': 0.009534403218946923, 'optimizer': 'adam', 'epochs': 400, 'batch_size': 64, 'n_layers': 1, 'n_units_l0': 30, 'dropout_l0': 0.2} | {'learning_rate': 0.0019869077621547677, 'optimizer': 'adam', 'epochs': 450, 'batch_size': 16, 'n_layers': 1, 'n_units_l0': 70, 'dropout_l0': 0.2} | {'learning_rate': 0.005269329024971373, 'optimizer': 'adam', 'epochs': 150, 'batch_size': 16, 'n_layers': 1, 'n_units_l0': 40, 'dropout_l0': 0.2}  |

|                    |                                                                                                                                                    |                                                                                                                                                    |                                                                                                                                                    |
|--------------------|----------------------------------------------------------------------------------------------------------------------------------------------------|----------------------------------------------------------------------------------------------------------------------------------------------------|----------------------------------------------------------------------------------------------------------------------------------------------------|
|                    | 250, 'batch_size': 64, 'n_layers': 1, 'n_units_l0': 40, 'dropout_l0': 0.2}                                                                         | 300, 'batch_size': 64, 'n_layers': 1, 'n_units_l0': 100, 'dropout_l0': 0.2}                                                                        | 'batch_size': 240, 'n_layers': 1, 'n_units_l0': 80, 'dropout_l0': 0.2}                                                                             |
| 01252X0011/<br>S1  | {'learning_rate': 0.009282156083736918, 'optimizer': 'adam', 'epochs': 150, 'batch_size': 80, 'n_layers': 1, 'n_units_l0': 100, 'dropout_l0': 0.2} | {'learning_rate': 0.0013001227621881476, 'optimizer': 'adam', 'epochs': 450, 'batch_size': 16, 'n_layers': 1, 'n_units_l0': 70, 'dropout_l0': 0.2} | {'learning_rate': 0.005269329024971373, 'optimizer': 'adam', 'epochs': 150, 'batch_size': 240, 'n_layers': 1, 'n_units_l0': 80, 'dropout_l0': 0.2} |
| 01258X0020/<br>S1  | {'learning_rate': 0.008103056755532596, 'optimizer': 'adam', 'epochs': 200, 'batch_size': 32, 'n_layers': 1, 'n_units_l0': 40, 'dropout_l0': 0.2}  | {'learning_rate': 0.005269329024971373, 'optimizer': 'adam', 'epochs': 150, 'batch_size': 240, 'n_layers': 1, 'n_units_l0': 80, 'dropout_l0': 0.2} | {'learning_rate': 0.007210036192517294, 'optimizer': 'adam', 'epochs': 350, 'batch_size': 144, 'n_layers': 1, 'n_units_l0': 90, 'dropout_l0': 0.2} |
| 01264X0029/<br>S1  | {'learning_rate': 0.004470922913421275, 'optimizer': 'adam', 'epochs': 350, 'batch_size': 208, 'n_layers': 1, 'n_units_l0': 60, 'dropout_l0': 0.2} | {'learning_rate': 0.0013001227621881476, 'optimizer': 'adam', 'epochs': 450, 'batch_size': 16, 'n_layers': 1, 'n_units_l0': 70, 'dropout_l0': 0.2} | {'learning_rate': 0.0024196194493571197, 'optimizer': 'adam', 'epochs': 400, 'batch_size': 80, 'n_layers': 1, 'n_units_l0': 90, 'dropout_l0': 0.2} |
| 01287X0017/<br>S1  | {'learning_rate': 0.008103056755532596, 'optimizer': 'adam', 'epochs': 200, 'batch_size': 32, 'n_layers': 1, 'n_units_l0': 40, 'dropout_l0': 0.2}  | {'learning_rate': 0.0013001227621881476, 'optimizer': 'adam', 'epochs': 450, 'batch_size': 16, 'n_layers': 1, 'n_units_l0': 70, 'dropout_l0': 0.2} | {'learning_rate': 0.009681298865877503, 'optimizer': 'adam', 'epochs': 450, 'batch_size': 192, 'n_layers': 1, 'n_units_l0': 50, 'dropout_l0': 0.2} |
| 01347X0002/<br>S1  | {'learning_rate': 0.009981300982599807, 'optimizer': 'adam', 'epochs': 350, 'batch_size': 64, 'n_layers': 1, 'n_units_l0': 100, 'dropout_l0': 0.2} | {'learning_rate': 0.003151425264040375, 'optimizer': 'adam', 'epochs': 150, 'batch_size': 64, 'n_layers': 1, 'n_units_l0': 80, 'dropout_l0': 0.2}  | {'learning_rate': 0.0013001227621881476, 'optimizer': 'adam', 'epochs': 450, 'batch_size': 16, 'n_layers': 1, 'n_units_l0': 70, 'dropout_l0': 0.2} |
| 01381X0070/<br>P25 | {'learning_rate': 0.004969445949093749, 'optimizer': 'adam', 'epochs': 250, 'batch_size': 64, 'n_layers': 1,                                       | {'learning_rate': 0.00774217464900856, 'optimizer': 'adam', 'epochs': 250, 'batch_size': 32, 'n_layers': 1,                                        | {'learning_rate': 0.008103056755532596, 'optimizer': 'adam', 'epochs': 200, 'batch_size': 32, 'n_layers': 1,                                       |

|                    |                                                                                                                                                                          |                                                                                                                                                                          |                                                                                                                                                                          |
|--------------------|--------------------------------------------------------------------------------------------------------------------------------------------------------------------------|--------------------------------------------------------------------------------------------------------------------------------------------------------------------------|--------------------------------------------------------------------------------------------------------------------------------------------------------------------------|
|                    | 'n_units_l0': 70,<br>'dropout_l0': 0.2}                                                                                                                                  | 'n_units_l0': 50,<br>'dropout_l0': 0.2}                                                                                                                                  | 'n_units_l0': 40,<br>'dropout_l0': 0.2}                                                                                                                                  |
| 01461X0012/<br>S1  | {'learning_rate':<br>0.0097045383652<br>01885, 'optimizer':<br>'adam', 'epochs':<br>400, 'batch_size':<br>64, 'n_layers': 1,<br>'n_units_l0': 30,<br>'dropout_l0': 0.2}  | {'learning_rate':<br>0.009707480295841<br>904, 'optimizer':<br>'adam', 'epochs':<br>400, 'batch_size': 64,<br>'n_layers': 1,<br>'n_units_l0': 30,<br>'dropout_l0': 0.2}  | {'learning_rate':<br>0.008590069145513<br>27, 'optimizer':<br>'adam', 'epochs': 350,<br>'batch_size': 96,<br>'n_layers': 1,<br>'n_units_l0': 30,<br>'dropout_l0': 0.2}   |
| 01473X0087/<br>S1  | {'learning_rate':<br>0.0099526522024<br>5213, 'optimizer':<br>'adam', 'epochs':<br>350, 'batch_size':<br>48, 'n_layers': 1,<br>'n_units_l0': 50,<br>'dropout_l0': 0.2}   | {'learning_rate':<br>0.001967305713793<br>6214, 'optimizer':<br>'adam', 'epochs':<br>350, 'batch_size': 16,<br>'n_layers': 1,<br>'n_units_l0': 90,<br>'dropout_l0': 0.2} | {'learning_rate':<br>0.007950991288447<br>225, 'optimizer':<br>'adam', 'epochs': 400,<br>'batch_size': 112,<br>'n_layers': 1,<br>'n_units_l0': 50,<br>'dropout_l0': 0.2} |
| 01491X0009/<br>S1  | {'learning_rate':<br>0.0044709229134<br>21275, 'optimizer':<br>'adam', 'epochs':<br>350, 'batch_size':<br>208, 'n_layers': 1,<br>'n_units_l0': 60,<br>'dropout_l0': 0.2} | {'learning_rate':<br>0.003826890237851<br>838, 'optimizer':<br>'adam', 'epochs':<br>200, 'batch_size':<br>224, 'n_layers': 1,<br>'n_units_l0': 80,<br>'dropout_l0': 0.2} | {'learning_rate':<br>0.001009132669840<br>099, 'optimizer':<br>'adam', 'epochs': 300,<br>'batch_size': 224,<br>'n_layers': 1,<br>'n_units_l0': 70,<br>'dropout_l0': 0.2} |
| 01516X0004/<br>S1  | {'learning_rate':<br>0.0099891338549<br>917, 'optimizer':<br>'adam', 'epochs':<br>350, 'batch_size':<br>80, 'n_layers': 1,<br>'n_units_l0': 100,<br>'dropout_l0': 0.2}   | {'learning_rate':<br>0.003151425264040<br>375, 'optimizer':<br>'adam', 'epochs':<br>150, 'batch_size': 64,<br>'n_layers': 1,<br>'n_units_l0': 80,<br>'dropout_l0': 0.2}  | {'learning_rate':<br>0.007917876446858<br>305, 'optimizer':<br>'adam', 'epochs': 350,<br>'batch_size': 144,<br>'n_layers': 1,<br>'n_units_l0': 90,<br>'dropout_l0': 0.2} |
| 01584X0023/<br>LV3 | {'learning_rate':<br>0.0042842519067<br>62034, 'optimizer':<br>'adam', 'epochs':<br>200, 'batch_size':<br>32, 'n_layers': 1,<br>'n_units_l0': 40,<br>'dropout_l0': 0.2}  | {'learning_rate':<br>0.001300122762188<br>1476, 'optimizer':<br>'adam', 'epochs':<br>450, 'batch_size': 16,<br>'n_layers': 1,<br>'n_units_l0': 70,<br>'dropout_l0': 0.2} | {'learning_rate':<br>0.008103056755532<br>596, 'optimizer':<br>'adam', 'epochs': 200,<br>'batch_size': 32,<br>'n_layers': 1,<br>'n_units_l0': 40,<br>'dropout_l0': 0.2}  |
| 01871X0031/<br>S1  | {'learning_rate':<br>0.0081030567555<br>32596, 'optimizer':<br>'adam', 'epochs':<br>200, 'batch_size':<br>32, 'n_layers': 1,<br>'n_units_l0': 40,<br>'dropout_l0': 0.2}  | {'learning_rate':<br>0.005269329024971<br>373, 'optimizer':<br>'adam', 'epochs':<br>150, 'batch_size':<br>240, 'n_layers': 1,<br>'n_units_l0': 80,<br>'dropout_l0': 0.2} | {'learning_rate':<br>0.004470922913421<br>275, 'optimizer':<br>'adam', 'epochs': 350,<br>'batch_size': 208,<br>'n_layers': 1,<br>'n_units_l0': 60,<br>'dropout_l0': 0.2} |

|                     |                                                                                                                                                                             |                                                                                                                                                                           |                                                                                                                                                                          |
|---------------------|-----------------------------------------------------------------------------------------------------------------------------------------------------------------------------|---------------------------------------------------------------------------------------------------------------------------------------------------------------------------|--------------------------------------------------------------------------------------------------------------------------------------------------------------------------|
| 01995X0012/<br>342B | {'learning_rate':<br>0.0043589747030<br>68952, 'optimizer':<br>'adam', 'epochs':<br>250, 'batch_size':<br>48, 'n_layers': 1,<br>'n_units_l0': 40,<br>'dropout_l0': 0.2}     | {'learning_rate':<br>0.008103056755532<br>596, 'optimizer':<br>'adam', 'epochs':<br>200, 'batch_size': 32,<br>'n_layers': 1,<br>'n_units_l0': 40,<br>'dropout_l0': 0.2}   | {'learning_rate':<br>0.006806686454144<br>779, 'optimizer':<br>'adam', 'epochs': 450,<br>'batch_size': 64,<br>'n_layers': 1,<br>'n_units_l0': 40,<br>'dropout_l0': 0.2}  |
| 02206X0022/<br>S1   | {'learning_rate':<br>0.0081030567555<br>32596, 'optimizer':<br>'adam', 'epochs':<br>200, 'batch_size':<br>32, 'n_layers': 1,<br>'n_units_l0': 40,<br>'dropout_l0': 0.2}     | {'learning_rate':<br>0.003151425264040<br>375, 'optimizer':<br>'adam', 'epochs':<br>150, 'batch_size': 64,<br>'n_layers': 1,<br>'n_units_l0': 80,<br>'dropout_l0': 0.2}   | {'learning_rate':<br>0.001009132669840<br>099, 'optimizer':<br>'adam', 'epochs': 300,<br>'batch_size': 224,<br>'n_layers': 1,<br>'n_units_l0': 70,<br>'dropout_l0': 0.2} |
| 02225X0016/<br>S1   | {'learning_rate':<br>0.0013001227621<br>881476,<br>'optimizer': 'adam',<br>'epochs': 450,<br>'batch_size': 16,<br>'n_layers': 1,<br>'n_units_l0': 70,<br>'dropout_l0': 0.2} | {'learning_rate':<br>0.001300122762188<br>1476, 'optimizer':<br>'adam', 'epochs':<br>450, 'batch_size': 16,<br>'n_layers': 1,<br>'n_units_l0': 70,<br>'dropout_l0': 0.2}  | {'learning_rate':<br>0.004875095617603<br>179, 'optimizer':<br>'adam', 'epochs': 150,<br>'batch_size': 80,<br>'n_layers': 1,<br>'n_units_l0': 100,<br>'dropout_l0': 0.2} |
| 02347X0022/<br>314  | {'learning_rate':<br>0.0087595994048<br>09302, 'optimizer':<br>'adam', 'epochs':<br>500, 'batch_size':<br>16, 'n_layers': 1,<br>'n_units_l0': 20,<br>'dropout_l0': 0.2}     | {'learning_rate':<br>0.002765878983990<br>4367, 'optimizer':<br>'adam', 'epochs':<br>250, 'batch_size':<br>160, 'n_layers': 1,<br>'n_units_l0': 60,<br>'dropout_l0': 0.2} | {'learning_rate':<br>0.005269329024971<br>373, 'optimizer':<br>'adam', 'epochs': 150,<br>'batch_size': 240,<br>'n_layers': 1,<br>'n_units_l0': 80,<br>'dropout_l0': 0.2} |
| 02566X0019/<br>S1   | {'learning_rate':<br>0.0081030567555<br>32596, 'optimizer':<br>'adam', 'epochs':<br>200, 'batch_size':<br>32, 'n_layers': 1,<br>'n_units_l0': 40,<br>'dropout_l0': 0.2}     | {'learning_rate':<br>0.006794402113345<br>505, 'optimizer':<br>'adam', 'epochs':<br>350, 'batch_size': 96,<br>'n_layers': 1,<br>'n_units_l0': 70,<br>'dropout_l0': 0.2}   | {'learning_rate':<br>0.004470922913421<br>275, 'optimizer':<br>'adam', 'epochs': 350,<br>'batch_size': 208,<br>'n_layers': 1,<br>'n_units_l0': 60,<br>'dropout_l0': 0.2} |
| 02617X0009/<br>S1   | {'learning_rate':<br>0.0031514252640<br>40375, 'optimizer':<br>'adam', 'epochs':<br>150, 'batch_size':<br>64, 'n_layers': 1,<br>'n_units_l0': 80,<br>'dropout_l0': 0.2}     | {'learning_rate':<br>0.002765878983990<br>4367, 'optimizer':<br>'adam', 'epochs':<br>250, 'batch_size':<br>160, 'n_layers': 1,<br>'n_units_l0': 60,<br>'dropout_l0': 0.2} | {'learning_rate':<br>0.003151425264040<br>375, 'optimizer':<br>'adam', 'epochs': 150,<br>'batch_size': 64,<br>'n_layers': 1,<br>'n_units_l0': 80,<br>'dropout_l0': 0.2}  |

|                    |                                                                                                                                                                           |                                                                                                                                                                           |                                                                                                                                                                          |
|--------------------|---------------------------------------------------------------------------------------------------------------------------------------------------------------------------|---------------------------------------------------------------------------------------------------------------------------------------------------------------------------|--------------------------------------------------------------------------------------------------------------------------------------------------------------------------|
| 02636X0009/<br>S1  | {'learning_rate':<br>0.0097747767774<br>96903, 'optimizer':<br>'adam', 'epochs':<br>200, 'batch_size':<br>80, 'n_layers': 1,<br>'n_units_l0': 100,<br>'dropout_l0': 0.2}  | {'learning_rate':<br>0.007495659935295<br>373, 'optimizer':<br>'adam', 'epochs':<br>400, 'batch_size':<br>112, 'n_layers': 1,<br>'n_units_l0': 100,<br>'dropout_l0': 0.2} | {'learning_rate':<br>0.003151425264040<br>375, 'optimizer':<br>'adam', 'epochs': 150,<br>'batch_size': 64,<br>'n_layers': 1,<br>'n_units_l0': 80,<br>'dropout_l0': 0.2}  |
| 02726X0029/<br>238 | {'learning_rate':<br>0.0097747767774<br>96903, 'optimizer':<br>'adam', 'epochs':<br>200, 'batch_size':<br>80, 'n_layers': 1,<br>'n_units_l0': 100,<br>'dropout_l0': 0.2}  | {'learning_rate':<br>0.008759599404809<br>302, 'optimizer':<br>'adam', 'epochs':<br>500, 'batch_size': 16,<br>'n_layers': 1,<br>'n_units_l0': 20,<br>'dropout_l0': 0.2}   | {'learning_rate':<br>0.008819753706964<br>301, 'optimizer':<br>'adam', 'epochs': 500,<br>'batch_size': 16,<br>'n_layers': 1,<br>'n_units_l0': 20,<br>'dropout_l0': 0.2}  |
| 02923X0007/<br>F   | {'learning_rate':<br>0.0044709229134<br>21275, 'optimizer':<br>'adam', 'epochs':<br>350, 'batch_size':<br>208, 'n_layers': 1,<br>'n_units_l0': 60,<br>'dropout_l0': 0.2}  | {'learning_rate':<br>0.004470922913421<br>275, 'optimizer':<br>'adam', 'epochs':<br>350, 'batch_size':<br>208, 'n_layers': 1,<br>'n_units_l0': 60,<br>'dropout_l0': 0.2}  | {'learning_rate':<br>0.004470922913421<br>275, 'optimizer':<br>'adam', 'epochs': 350,<br>'batch_size': 208,<br>'n_layers': 1,<br>'n_units_l0': 60,<br>'dropout_l0': 0.2} |
| 02931X0008/<br>S1  | {'learning_rate':<br>0.0051430942767<br>31783, 'optimizer':<br>'adam', 'epochs':<br>400, 'batch_size':<br>160, 'n_layers': 1,<br>'n_units_l0': 100,<br>'dropout_l0': 0.2} | {'learning_rate':<br>0.003151425264040<br>375, 'optimizer':<br>'adam', 'epochs':<br>150, 'batch_size': 64,<br>'n_layers': 1,<br>'n_units_l0': 80,<br>'dropout_l0': 0.2}   | {'learning_rate':<br>0.001009132669840<br>099, 'optimizer':<br>'adam', 'epochs': 300,<br>'batch_size': 224,<br>'n_layers': 1,<br>'n_units_l0': 70,<br>'dropout_l0': 0.2} |
| 02974X0004/<br>S1  | {'learning_rate':<br>0.0092821560837<br>36918, 'optimizer':<br>'adam', 'epochs':<br>150, 'batch_size':<br>80, 'n_layers': 1,<br>'n_units_l0': 100,<br>'dropout_l0': 0.2}  | {'learning_rate':<br>0.009282156083736<br>918, 'optimizer':<br>'adam', 'epochs':<br>150, 'batch_size': 80,<br>'n_layers': 1,<br>'n_units_l0': 100,<br>'dropout_l0': 0.2}  | {'learning_rate':<br>0.008103056755532<br>596, 'optimizer':<br>'adam', 'epochs': 200,<br>'batch_size': 32,<br>'n_layers': 1,<br>'n_units_l0': 40,<br>'dropout_l0': 0.2}  |
| 03272X0006/<br>PZ  | {'learning_rate':<br>0.0094699682074<br>649, 'optimizer':<br>'adam', 'epochs':<br>250, 'batch_size':<br>208, 'n_layers': 1,<br>'n_units_l0': 40,<br>'dropout_l0': 0.2}    | {'learning_rate':<br>0.001009132669840<br>099, 'optimizer':<br>'adam', 'epochs':<br>300, 'batch_size':<br>224, 'n_layers': 1,<br>'n_units_l0': 70,<br>'dropout_l0': 0.2}  | {'learning_rate':<br>0.001009132669840<br>099, 'optimizer':<br>'adam', 'epochs': 300,<br>'batch_size': 224,<br>'n_layers': 1,<br>'n_units_l0': 70,<br>'dropout_l0': 0.2} |
| 03276X0009/<br>P   | {'learning_rate':<br>0.0042287527654                                                                                                                                      | {'learning_rate':<br>0.003151425264040                                                                                                                                    | {'learning_rate':<br>0.003151425264040                                                                                                                                   |

|                       |                                                                                                                                                                             |                                                                                                                                                                           |                                                                                                                                                                           |
|-----------------------|-----------------------------------------------------------------------------------------------------------------------------------------------------------------------------|---------------------------------------------------------------------------------------------------------------------------------------------------------------------------|---------------------------------------------------------------------------------------------------------------------------------------------------------------------------|
|                       | 560056,<br>'optimizer': 'adam',<br>'epochs': 350,<br>'batch_size': 48,<br>'n_layers': 1,<br>'n_units_l0': 90,<br>'dropout_l0': 0.2}                                         | 375, 'optimizer':<br>'adam', 'epochs':<br>150, 'batch_size': 64,<br>'n_layers': 1,<br>'n_units_l0': 80,<br>'dropout_l0': 0.2}                                             | 375, 'optimizer':<br>'adam', 'epochs': 150,<br>'batch_size': 64,<br>'n_layers': 1,<br>'n_units_l0': 80,<br>'dropout_l0': 0.2}                                             |
| 03287X0018/<br>S1     | {'learning_rate':<br>0.0031514252640<br>40375, 'optimizer':<br>'adam', 'epochs':<br>150, 'batch_size':<br>64, 'n_layers': 1,<br>'n_units_l0': 80,<br>'dropout_l0': 0.2}     | {'learning_rate':<br>0.002974106488417<br>6733, 'optimizer':<br>'adam', 'epochs':<br>250, 'batch_size': 80,<br>'n_layers': 1,<br>'n_units_l0': 90,<br>'dropout_l0': 0.2}  | {'learning_rate':<br>0.006864998400835<br>032, 'optimizer':<br>'adam', 'epochs': 250,<br>'batch_size': 112,<br>'n_layers': 1,<br>'n_units_l0': 70,<br>'dropout_l0': 0.2}  |
| 03622X0027/<br>PZ     | {'learning_rate':<br>0.0031514252640<br>40375, 'optimizer':<br>'adam', 'epochs':<br>150, 'batch_size':<br>64, 'n_layers': 1,<br>'n_units_l0': 80,<br>'dropout_l0': 0.2}     | {'learning_rate':<br>0.002765878983990<br>4367, 'optimizer':<br>'adam', 'epochs':<br>250, 'batch_size':<br>160, 'n_layers': 1,<br>'n_units_l0': 60,<br>'dropout_l0': 0.2} | {'learning_rate':<br>0.002765878983990<br>4367, 'optimizer':<br>'adam', 'epochs': 250,<br>'batch_size': 160,<br>'n_layers': 1,<br>'n_units_l0': 60,<br>'dropout_l0': 0.2} |
| 04132X0086/<br>PP6    | {'learning_rate':<br>0.0020822598979<br>197784,<br>'optimizer': 'adam',<br>'epochs': 200,<br>'batch_size': 64,<br>'n_layers': 1,<br>'n_units_l0': 90,<br>'dropout_l0': 0.2} | {'learning_rate':<br>0.003151425264040<br>375, 'optimizer':<br>'adam', 'epochs':<br>150, 'batch_size': 64,<br>'n_layers': 1,<br>'n_units_l0': 80,<br>'dropout_l0': 0.2}   | {'learning_rate':<br>0.007214354848482<br>611, 'optimizer':<br>'adam', 'epochs': 450,<br>'batch_size': 144,<br>'n_layers': 1,<br>'n_units_l0': 50,<br>'dropout_l0': 0.2}  |
| 04137X0018/<br>15     | {'learning_rate':<br>0.0081733824901<br>97835, 'optimizer':<br>'adam', 'epochs':<br>500, 'batch_size':<br>80, 'n_layers': 1,<br>'n_units_l0': 50,<br>'dropout_l0': 0.2}     | {'learning_rate':<br>0.009707480295841<br>904, 'optimizer':<br>'adam', 'epochs':<br>400, 'batch_size': 64,<br>'n_layers': 1,<br>'n_units_l0': 30,<br>'dropout_l0': 0.2}   | {'learning_rate':<br>0.004470922913421<br>275, 'optimizer':<br>'adam', 'epochs': 350,<br>'batch_size': 208,<br>'n_layers': 1,<br>'n_units_l0': 60,<br>'dropout_l0': 0.2}  |
| 04398X0002/<br>SONDAG | {'learning_rate':<br>0.0087595994048<br>09302, 'optimizer':<br>'adam', 'epochs':<br>500, 'batch_size':<br>16, 'n_layers': 1,<br>'n_units_l0': 20,<br>'dropout_l0': 0.2}     | {'learning_rate':<br>0.008819753706964<br>301, 'optimizer':<br>'adam', 'epochs':<br>500, 'batch_size': 16,<br>'n_layers': 1,<br>'n_units_l0': 20,<br>'dropout_l0': 0.2}   | {'learning_rate':<br>0.009660529800880<br>094, 'optimizer':<br>'adam', 'epochs': 250,<br>'batch_size': 16,<br>'n_layers': 1,<br>'n_units_l0': 40,<br>'dropout_l0': 0.2}   |
| 04458X0023/<br>S3     | {'learning_rate':<br>0.0081030567555                                                                                                                                        | {'learning_rate':<br>0.004122917646627                                                                                                                                    | {'learning_rate':<br>0.009707480295841                                                                                                                                    |



|                       |                                                                                                                                                    |                                                                                                                                                    |                                                                                                                                                    |
|-----------------------|----------------------------------------------------------------------------------------------------------------------------------------------------|----------------------------------------------------------------------------------------------------------------------------------------------------|----------------------------------------------------------------------------------------------------------------------------------------------------|
|                       | 32596, 'optimizer': 'adam', 'epochs': 200, 'batch_size': 32, 'n_layers': 1, 'n_units_l0': 40, 'dropout_l0': 0.2}                                   | 0265, 'optimizer': 'adam', 'epochs': 200, 'batch_size': 48, 'n_layers': 1, 'n_units_l0': 100, 'dropout_l0': 0.2}                                   | 904, 'optimizer': 'adam', 'epochs': 400, 'batch_size': 64, 'n_layers': 1, 'n_units_l0': 30, 'dropout_l0': 0.2}                                     |
| 00061X0117/<br>PZ1    | {'learning_rate': 0.009534403218946923, 'optimizer': 'adam', 'epochs': 150, 'batch_size': 64, 'n_layers': 1, 'n_units_l0': 40, 'dropout_l0': 0.2}  | {'learning_rate': 0.005269329024971373, 'optimizer': 'adam', 'epochs': 150, 'batch_size': 240, 'n_layers': 1, 'n_units_l0': 80, 'dropout_l0': 0.2} | {'learning_rate': 0.006875829206466048, 'optimizer': 'adam', 'epochs': 400, 'batch_size': 112, 'n_layers': 1, 'n_units_l0': 90, 'dropout_l0': 0.2} |
| 00263X0129/<br>PZASA4 | {'learning_rate': 0.0022046805972118027, 'optimizer': 'adam', 'epochs': 400, 'batch_size': 16, 'n_layers': 1, 'n_units_l0': 90, 'dropout_l0': 0.2} | {'learning_rate': 0.003151425264040375, 'optimizer': 'adam', 'epochs': 150, 'batch_size': 64, 'n_layers': 1, 'n_units_l0': 80, 'dropout_l0': 0.2}  | {'learning_rate': 0.009751298348816691, 'optimizer': 'adam', 'epochs': 300, 'batch_size': 112, 'n_layers': 1, 'n_units_l0': 40, 'dropout_l0': 0.2} |
| 00275X0005/<br>P1     | {'learning_rate': 0.008103056755532596, 'optimizer': 'adam', 'epochs': 200, 'batch_size': 32, 'n_layers': 1, 'n_units_l0': 40, 'dropout_l0': 0.2}  | {'learning_rate': 0.004470922913421275, 'optimizer': 'adam', 'epochs': 350, 'batch_size': 208, 'n_layers': 1, 'n_units_l0': 60, 'dropout_l0': 0.2} | {'learning_rate': 0.003151425264040375, 'optimizer': 'adam', 'epochs': 150, 'batch_size': 64, 'n_layers': 1, 'n_units_l0': 80, 'dropout_l0': 0.2}  |
| 00346X0011/<br>S1     | {'learning_rate': 0.008103056755532596, 'optimizer': 'adam', 'epochs': 200, 'batch_size': 32, 'n_layers': 1, 'n_units_l0': 40, 'dropout_l0': 0.2}  | {'learning_rate': 0.003151425264040375, 'optimizer': 'adam', 'epochs': 150, 'batch_size': 64, 'n_layers': 1, 'n_units_l0': 80, 'dropout_l0': 0.2}  | {'learning_rate': 0.005269329024971373, 'optimizer': 'adam', 'epochs': 150, 'batch_size': 240, 'n_layers': 1, 'n_units_l0': 80, 'dropout_l0': 0.2} |
| 00463X0036/<br>H1     | {'learning_rate': 0.005269329024971373, 'optimizer': 'adam', 'epochs': 150, 'batch_size': 240, 'n_layers': 1, 'n_units_l0': 80, 'dropout_l0': 0.2} | {'learning_rate': 0.001009132669840099, 'optimizer': 'adam', 'epochs': 300, 'batch_size': 224, 'n_layers': 1, 'n_units_l0': 70, 'dropout_l0': 0.2} | {'learning_rate': 0.001009132669840099, 'optimizer': 'adam', 'epochs': 300, 'batch_size': 224, 'n_layers': 1, 'n_units_l0': 70, 'dropout_l0': 0.2} |
| 02603X0009/<br>S1     | {'learning_rate': 0.007495659935295373, 'optimizer':                                                                                               | {'learning_rate': 0.00455759994126212, 'optimizer':                                                                                                | {'learning_rate': 0.005269329024971373, 'optimizer':                                                                                               |

|  |                                                                                                |                                                                                                |                                                                                               |
|--|------------------------------------------------------------------------------------------------|------------------------------------------------------------------------------------------------|-----------------------------------------------------------------------------------------------|
|  | 'adam', 'epochs': 400, 'batch_size': 112, 'n_layers': 1, 'n_units_l0': 100, 'dropout_l0': 0.2} | 'adam', 'epochs': 400, 'batch_size': 112, 'n_layers': 1, 'n_units_l0': 100, 'dropout_l0': 0.2} | 'adam', 'epochs': 150, 'batch_size': 240, 'n_layers': 1, 'n_units_l0': 80, 'dropout_l0': 0.2} |
|--|------------------------------------------------------------------------------------------------|------------------------------------------------------------------------------------------------|-----------------------------------------------------------------------------------------------|

Table S5: Input shape of different multi-station approaches

| Approach | Shape of input data for training (Standalone) | Wavelet          |
|----------|-----------------------------------------------|------------------|
| NO       | (39952, 48, 7)                                | (39952, 48, 35)  |
| OHE      | (39952, 48, 83)                               | (39952, 48, 111) |
| STAT     | (39952, 48, 24)                               | (39952, 48, 52)  |
| STAT_OHE | (39952, 48, 100)                              | (39952, 48, 128) |

Table S6: Hyperparameters of Multi-station Standalone Models

| Approach | GRU                                                                                                                             | LSTM                                                                                                                            | BiLSTM                                                                                                                                             |
|----------|---------------------------------------------------------------------------------------------------------------------------------|---------------------------------------------------------------------------------------------------------------------------------|----------------------------------------------------------------------------------------------------------------------------------------------------|
| NO       | {'learning_rate': 0.001009132669840099, 'optimizer': 'adam', 'epochs': 300, 'batch_size': 224, 'n_layers': 1, 'n_units_l0': 70, | {'learning_rate': 0.005269329024971373, 'optimizer': 'adam', 'epochs': 150, 'batch_size': 240, 'n_layers': 1, 'n_units_l0': 80, | {'learning_rate': 0.001009132669840099, 'optimizer': 'adam', 'epochs': 300, 'batch_size': 224, 'n_layers': 1, 'n_units_l0': 70, 'dropout_l0': 0.2} |

|          |                                                                                                                                                    |                                                                                                                                                    |                                                                                                                                                    |
|----------|----------------------------------------------------------------------------------------------------------------------------------------------------|----------------------------------------------------------------------------------------------------------------------------------------------------|----------------------------------------------------------------------------------------------------------------------------------------------------|
|          | 'dropout_l0': 0.2}                                                                                                                                 | 'dropout_l0': 0.2}                                                                                                                                 |                                                                                                                                                    |
| OHE      | {'learning_rate': 0.001009132669840099, 'optimizer': 'adam', 'epochs': 300, 'batch_size': 224, 'n_layers': 1, 'n_units_l0': 70, 'dropout_l0': 0.2} | {'learning_rate': 0.001009132669840099, 'optimizer': 'adam', 'epochs': 300, 'batch_size': 224, 'n_layers': 1, 'n_units_l0': 70, 'dropout_l0': 0.2} | {'learning_rate': 0.005269329024971373, 'optimizer': 'adam', 'epochs': 150, 'batch_size': 240, 'n_layers': 1, 'n_units_l0': 80, 'dropout_l0': 0.2} |
| STAT     | {'learning_rate': 0.001009132669840099, 'optimizer': 'adam', 'epochs': 300, 'batch_size': 224, 'n_layers': 1, 'n_units_l0': 70, 'dropout_l0': 0.2} | {'learning_rate': 0.003487742134799628, 'optimizer': 'adam', 'epochs': 100, 'batch_size': 96, 'n_layers': 1, 'n_units_l0': 70, 'dropout_l0': 0.2}  | {'learning_rate': 0.0029166390295633435, 'optimizer': 'adam', 'epochs': 150, 'batch_size': 64, 'n_layers': 1, 'n_units_l0': 80, 'dropout_l0': 0.2} |
| STAT_OHE | {'learning_rate': 0.001009132669840099, 'optimizer': 'adam', 'epochs': 300, 'batch_size': 224, 'n_layers': 1, 'n_units_l0': 70, 'dropout_l0': 0.2} | {'learning_rate': 0.001009132669840099, 'optimizer': 'adam', 'epochs': 300, 'batch_size': 224, 'n_layers': 1, 'n_units_l0': 70, 'dropout_l0': 0.2} | {'learning_rate': 0.001009132669840099, 'optimizer': 'adam', 'epochs': 300, 'batch_size': 224, 'n_layers': 1, 'n_units_l0': 70, 'dropout_l0': 0.2} |

Table S7: Hyperparameters of Multi-station Wavelet models

| Approach | GRU                                                                                                                                                | LSTM                                                                                                                                               | BiLSTM                                                                                                                                             |
|----------|----------------------------------------------------------------------------------------------------------------------------------------------------|----------------------------------------------------------------------------------------------------------------------------------------------------|----------------------------------------------------------------------------------------------------------------------------------------------------|
| NO       | {'learning_rate': 0.001009132669840099, 'optimizer': 'adam', 'epochs': 300, 'batch_size': 224, 'n_layers': 1, 'n_units_l0': 70, 'dropout_l0': 0.2} | {'learning_rate': 0.005269329024971373, 'optimizer': 'adam', 'epochs': 150, 'batch_size': 240, 'n_layers': 1, 'n_units_l0': 80, 'dropout_l0': 0.2} | {'learning_rate': 0.001009132669840099, 'optimizer': 'adam', 'epochs': 300, 'batch_size': 224, 'n_layers': 1, 'n_units_l0': 70, 'dropout_l0': 0.2} |

|          |                                                                                                                                                                             |                                                                                                                                                                             |                                                                                                                                                                             |
|----------|-----------------------------------------------------------------------------------------------------------------------------------------------------------------------------|-----------------------------------------------------------------------------------------------------------------------------------------------------------------------------|-----------------------------------------------------------------------------------------------------------------------------------------------------------------------------|
| OHE      | {'learning_rate':<br>0.001009132669840099<br>,<br>'optimizer': 'adam',<br>'epochs': 300,<br>'batch_size': 224,<br>'n_layers': 1,<br>'n_units_l0': 70,<br>'dropout_l0': 0.2} | {'learning_rate':<br>0.005269329024971373<br>,<br>'optimizer': 'adam',<br>'epochs': 150,<br>'batch_size': 240,<br>'n_layers': 1,<br>'n_units_l0': 80,<br>'dropout_l0': 0.2} | {'learning_rate':<br>0.005269329024971373<br>,<br>'optimizer': 'adam',<br>'epochs': 150,<br>'batch_size': 240,<br>'n_layers': 1,<br>'n_units_l0': 80,<br>'dropout_l0': 0.2} |
| STAT     | {'learning_rate':<br>0.001009132669840099<br>,<br>'optimizer': 'adam',<br>'epochs': 300,<br>'batch_size': 224,<br>'n_layers': 1,<br>'n_units_l0': 70,<br>'dropout_l0': 0.2} | {'learning_rate':<br>0.005269329024971373<br>,<br>'optimizer': 'adam',<br>'epochs': 150,<br>'batch_size': 240,<br>'n_layers': 1,<br>'n_units_l0': 80,<br>'dropout_l0': 0.2} | {'learning_rate':<br>0.005269329024971373<br>,<br>'optimizer': 'adam',<br>'epochs': 150,<br>'batch_size': 240,<br>'n_layers': 1,<br>'n_units_l0': 80,<br>'dropout_l0': 0.2} |
| STAT_OHE | {'learning_rate':<br>0.001009132669840099<br>,<br>'optimizer': 'adam',<br>'epochs': 300,<br>'batch_size': 224,<br>'n_layers': 1,<br>'n_units_l0': 70,<br>'dropout_l0': 0.2} | {'learning_rate':<br>0.001009132669840099<br>,<br>'optimizer': 'adam',<br>'epochs': 300,<br>'batch_size': 224,<br>'n_layers': 1,<br>'n_units_l0': 70,<br>'dropout_l0': 0.2} | {'learning_rate':<br>0.005269329024971373<br>,<br>'optimizer': 'adam',<br>'epochs': 150,<br>'batch_size': 240,<br>'n_layers': 1,<br>'n_units_l0': 80,<br>'dropout_l0': 0.2} |

Table S8: Hyperparameters of cluster based multi-station standalone models

| Approach   | GW<br>L<br>Type | GRU                                                                                                    | LSTM                                                                             | BILSTM                                                                           |
|------------|-----------------|--------------------------------------------------------------------------------------------------------|----------------------------------------------------------------------------------|----------------------------------------------------------------------------------|
| Cluster_NO | annual          | {'learning_rate':<br>0.0052693290249<br>71373, 'optimizer':<br>'adam', 'epochs':<br>150, 'batch_size': | {'learning_rate':<br>0.001009132669<br>840099, 'optimizer':<br>'adam', 'epochs': | {'learning_rate':<br>0.001009132669<br>840099, 'optimizer':<br>'adam', 'epochs': |

|             |          |                                                                                                                                                     |                                                                                                                                                    |                                                                                                                                                    |
|-------------|----------|-----------------------------------------------------------------------------------------------------------------------------------------------------|----------------------------------------------------------------------------------------------------------------------------------------------------|----------------------------------------------------------------------------------------------------------------------------------------------------|
|             |          | 240, 'n_layers': 1, 'n_units_l0': 80, 'dropout_l0': 0.2}                                                                                            | 300, 'batch_size': 224, 'n_layers': 1, 'n_units_l0': 70, 'dropout_l0': 0.2}                                                                        | 300, 'batch_size': 224, 'n_layers': 1, 'n_units_l0': 70, 'dropout_l0': 0.2}                                                                        |
|             | inertial | {'learning_rate': 0.0027940569610945824, 'optimizer': 'adam', 'epochs': 250, 'batch_size': 192, 'n_layers': 1, 'n_units_l0': 80, 'dropout_l0': 0.2} | {'learning_rate': 0.003151425264040375, 'optimizer': 'adam', 'epochs': 150, 'batch_size': 64, 'n_layers': 1, 'n_units_l0': 80, 'dropout_l0': 0.2}  | {'learning_rate': 0.005269329024971373, 'optimizer': 'adam', 'epochs': 240, 'n_layers': 1, 'n_units_l0': 80, 'dropout_l0': 0.2}                    |
|             | mixed    | {'learning_rate': 0.005269329024971373, 'optimizer': 'adam', 'epochs': 150, 'batch_size': 240, 'n_layers': 1, 'n_units_l0': 80, 'dropout_l0': 0.2}  | {'learning_rate': 0.003151425264040375, 'optimizer': 'adam', 'epochs': 150, 'batch_size': 64, 'n_layers': 1, 'n_units_l0': 80, 'dropout_l0': 0.2}  | {'learning_rate': 0.001009132669840099, 'optimizer': 'adam', 'epochs': 300, 'batch_size': 224, 'n_layers': 1, 'n_units_l0': 70, 'dropout_l0': 0.2} |
| Cluster_OHE | annual   | {'learning_rate': 0.005269329024971373, 'optimizer': 'adam', 'epochs': 150, 'batch_size': 240, 'n_layers': 1, 'n_units_l0': 80, 'dropout_l0': 0.2}  | {'learning_rate': 0.001009132669840099, 'optimizer': 'adam', 'epochs': 300, 'batch_size': 224, 'n_layers': 1, 'n_units_l0': 70, 'dropout_l0': 0.2} | {'learning_rate': 0.001009132669840099, 'optimizer': 'adam', 'epochs': 300, 'batch_size': 224, 'n_layers': 1, 'n_units_l0': 70, 'dropout_l0': 0.2} |
|             | inertial | {'learning_rate': 0.005269329024971373, 'optimizer': 'adam', 'epochs': 150, 'batch_size': 240, 'n_layers': 1, 'n_units_l0': 80, 'dropout_l0': 0.2}  | {'learning_rate': 0.003151425264040375, 'optimizer': 'adam', 'epochs': 150, 'batch_size': 64, 'n_layers': 1, 'n_units_l0': 80, 'dropout_l0': 0.2}  | {'learning_rate': 0.005269329024971373, 'optimizer': 'adam', 'epochs': 240, 'n_layers': 1, 'n_units_l0': 80, 'dropout_l0': 0.2}                    |
|             | mixed    | {'learning_rate': 0.001009132669840099, 'optimizer': 'adam', 'epochs': 300, 'batch_size': 224, 'n_layers': 1, 'n_units_l0': 70, 'dropout_l0': 0.2}  | {'learning_rate': 0.005269329024971373, 'optimizer': 'adam', 'epochs': 150, 'batch_size': 240, 'n_layers': 1, 'n_units_l0': 80, 'dropout_l0': 0.2} | {'learning_rate': 0.001009132669840099, 'optimizer': 'adam', 'epochs': 300, 'batch_size': 224, 'n_layers': 1, 'n_units_l0': 70, 'dropout_l0': 0.2} |

|                    |          |                                                                                                                                                    |                                                                                                                                                    |                                                                                                                                                    |
|--------------------|----------|----------------------------------------------------------------------------------------------------------------------------------------------------|----------------------------------------------------------------------------------------------------------------------------------------------------|----------------------------------------------------------------------------------------------------------------------------------------------------|
| Cluster_Static     | annual   | {'learning_rate': 0.005269329024971373, 'optimizer': 'adam', 'epochs': 150, 'batch_size': 240, 'n_layers': 1, 'n_units_l0': 80, 'dropout_l0': 0.2} | {'learning_rate': 0.001009132669840099, 'optimizer': 'adam', 'epochs': 300, 'batch_size': 224, 'n_layers': 1, 'n_units_l0': 70, 'dropout_l0': 0.2} | {'learning_rate': 0.001009132669840099, 'optimizer': 'adam', 'epochs': 300, 'batch_size': 224, 'n_layers': 1, 'n_units_l0': 70, 'dropout_l0': 0.2} |
|                    | inertial | {'learning_rate': 0.005028014857866192, 'optimizer': 'adam', 'epochs': 150, 'batch_size': 256, 'n_layers': 1, 'n_units_l0': 90, 'dropout_l0': 0.2} | {'learning_rate': 0.003151425264040375, 'optimizer': 'adam', 'epochs': 150, 'batch_size': 64, 'n_layers': 1, 'n_units_l0': 80, 'dropout_l0': 0.2}  | {'learning_rate': 0.005269329024971373, 'optimizer': 'adam', 'epochs': 150, 'batch_size': 240, 'n_layers': 1, 'n_units_l0': 80, 'dropout_l0': 0.2} |
|                    | mixed    | {'learning_rate': 0.001009132669840099, 'optimizer': 'adam', 'epochs': 300, 'batch_size': 224, 'n_layers': 1, 'n_units_l0': 70, 'dropout_l0': 0.2} | {'learning_rate': 0.003151425264040375, 'optimizer': 'adam', 'epochs': 150, 'batch_size': 64, 'n_layers': 1, 'n_units_l0': 80, 'dropout_l0': 0.2}  | {'learning_rate': 0.005269329024971373, 'optimizer': 'adam', 'epochs': 150, 'batch_size': 240, 'n_layers': 1, 'n_units_l0': 80, 'dropout_l0': 0.2} |
| Cluster_Static_OHE | annual   | {'learning_rate': 0.005269329024971373, 'optimizer': 'adam', 'epochs': 150, 'batch_size': 240, 'n_layers': 1, 'n_units_l0': 80, 'dropout_l0': 0.2} | {'learning_rate': 0.001009132669840099, 'optimizer': 'adam', 'epochs': 300, 'batch_size': 224, 'n_layers': 1, 'n_units_l0': 70, 'dropout_l0': 0.2} | {'learning_rate': 0.001009132669840099, 'optimizer': 'adam', 'epochs': 300, 'batch_size': 224, 'n_layers': 1, 'n_units_l0': 70, 'dropout_l0': 0.2} |
|                    | inertial | {'learning_rate': 0.005269329024971373, 'optimizer': 'adam', 'epochs': 150, 'batch_size': 240, 'n_layers': 1, 'n_units_l0': 80, 'dropout_l0': 0.2} | {'learning_rate': 0.003151425264040375, 'optimizer': 'adam', 'epochs': 150, 'batch_size': 64, 'n_layers': 1, 'n_units_l0': 80, 'dropout_l0': 0.2}  | {'learning_rate': 0.003151425264040375, 'optimizer': 'adam', 'epochs': 150, 'batch_size': 64, 'n_layers': 1, 'n_units_l0': 80, 'dropout_l0': 0.2}  |
|                    | mixed    | {'learning_rate': 0.001009132669840099, 'optimizer': 'adam', 'epochs': 300, 'batch_size': 224, 'n_layers': 1, 'n_units_l0': 70, 'dropout_l0': 0.2} | {'learning_rate': 0.005269329024971373, 'optimizer': 'adam', 'epochs': 150, 'batch_size': 64, 'n_layers': 1, 'n_units_l0': 80, 'dropout_l0': 0.2}  | {'learning_rate': 0.001009132669840099, 'optimizer': 'adam', 'epochs': 300, 'batch_size': 224, 'n_layers': 1, 'n_units_l0': 70, 'dropout_l0': 0.2} |

|  |  |                                                          |                                                                             |                                                                             |
|--|--|----------------------------------------------------------|-----------------------------------------------------------------------------|-----------------------------------------------------------------------------|
|  |  | 224, 'n_layers': 1, 'n_units_l0': 70, 'dropout_l0': 0.2} | 150, 'batch_size': 240, 'n_layers': 1, 'n_units_l0': 80, 'dropout_l0': 0.2} | 300, 'batch_size': 224, 'n_layers': 1, 'n_units_l0': 70, 'dropout_l0': 0.2} |
|--|--|----------------------------------------------------------|-----------------------------------------------------------------------------|-----------------------------------------------------------------------------|

Table S9: Hyperparameters of cluster based multi-station wavelet models

| Approach   | GW L Type | GRU                                                                                                                                                | LSTM                                                                                                                                               | BILSTM                                                                                                                                             |
|------------|-----------|----------------------------------------------------------------------------------------------------------------------------------------------------|----------------------------------------------------------------------------------------------------------------------------------------------------|----------------------------------------------------------------------------------------------------------------------------------------------------|
| Cluster_NO | annual    | {'learning_rate': 0.005269329024971373, 'optimizer': 'adam', 'epochs': 150, 'batch_size': 240, 'n_layers': 1, 'n_units_l0': 80, 'dropout_l0': 0.2} | {'learning_rate': 0.004470922913421275, 'optimizer': 'adam', 'epochs': 350, 'batch_size': 208, 'n_layers': 1, 'n_units_l0': 60, 'dropout_l0': 0.2} | {'learning_rate': 0.005269329024971373, 'optimizer': 'adam', 'epochs': 150, 'batch_size': 240, 'n_layers': 1, 'n_units_l0': 80, 'dropout_l0': 0.2} |
|            | inertial  | {'learning_rate': 0.003151425264040375, 'optimizer': 'adam', 'epochs': 150, 'batch_size': 64, 'n_layers': 1, 'n_units_l0': 80, 'dropout_l0': 0.2}  | {'learning_rate': 0.003151425264040375, 'optimizer': 'adam', 'epochs': 150, 'batch_size': 64, 'n_layers': 1, 'n_units_l0': 80, 'dropout_l0': 0.2}  | {'learning_rate': 0.003151425264040375, 'optimizer': 'adam', 'epochs': 150, 'batch_size': 64, 'n_layers': 1, 'n_units_l0': 80, 'dropout_l0': 0.2}  |
|            | mixed     | {'learning_rate': 0.001009132669840099, 'optimizer': 'adam', 'epochs': 300, 'batch_size': 224, 'n_layers': 1,                                      | {'learning_rate': 0.006821777398460312, 'optimizer': 'adam', 'epochs': 350, 'batch_size': 144, 'n_layers': 1,                                      | {'learning_rate': 0.005269329024971373, 'optimizer': 'adam', 'epochs': 150, 'batch_size': 240, 'n_layers': 1,                                      |

|                |          |                                                                                                                                                                          |                                                                                                                                                                          |                                                                                                                                                                          |
|----------------|----------|--------------------------------------------------------------------------------------------------------------------------------------------------------------------------|--------------------------------------------------------------------------------------------------------------------------------------------------------------------------|--------------------------------------------------------------------------------------------------------------------------------------------------------------------------|
|                |          | 'n_units_l0': 70,<br>'dropout_l0': 0.2}                                                                                                                                  | 'n_units_l0': 50,<br>'dropout_l0': 0.2}                                                                                                                                  | 'n_units_l0': 80,<br>'dropout_l0': 0.2}                                                                                                                                  |
| Cluster_OHE    | annual   | {'learning_rate':<br>0.0052693290249<br>71373, 'optimizer':<br>'adam', 'epochs':<br>150, 'batch_size':<br>240, 'n_layers': 1,<br>'n_units_l0': 80,<br>'dropout_l0': 0.2} | {'learning_rate':<br>0.0031514252640<br>40375, 'optimizer':<br>'adam', 'epochs':<br>150, 'batch_size':<br>64, 'n_layers': 1,<br>'n_units_l0': 80,<br>'dropout_l0': 0.2}  | {'learning_rate':<br>0.0052693290249<br>71373, 'optimizer':<br>'adam', 'epochs':<br>150, 'batch_size':<br>240, 'n_layers': 1,<br>'n_units_l0': 80,<br>'dropout_l0': 0.2} |
|                | inertial | {'learning_rate':<br>0.0031514252640<br>40375, 'optimizer':<br>'adam', 'epochs':<br>150, 'batch_size':<br>64, 'n_layers': 1,<br>'n_units_l0': 80,<br>'dropout_l0': 0.2}  | {'learning_rate':<br>0.0031514252640<br>40375, 'optimizer':<br>'adam', 'epochs':<br>150, 'batch_size':<br>64, 'n_layers': 1,<br>'n_units_l0': 80,<br>'dropout_l0': 0.2}  | {'learning_rate':<br>0.0031514252640<br>40375, 'optimizer':<br>'adam', 'epochs':<br>150, 'batch_size':<br>64, 'n_layers': 1,<br>'n_units_l0': 80,<br>'dropout_l0': 0.2}  |
|                | mixed    | {'learning_rate':<br>0.0052693290249<br>71373, 'optimizer':<br>'adam', 'epochs':<br>150, 'batch_size':<br>240, 'n_layers': 1,<br>'n_units_l0': 80,<br>'dropout_l0': 0.2} | {'learning_rate':<br>0.0010091326698<br>40099, 'optimizer':<br>'adam', 'epochs':<br>300, 'batch_size':<br>224, 'n_layers': 1,<br>'n_units_l0': 70,<br>'dropout_l0': 0.2} | {'learning_rate':<br>0.0052693290249<br>71373, 'optimizer':<br>'adam', 'epochs':<br>150, 'batch_size':<br>240, 'n_layers': 1,<br>'n_units_l0': 80,<br>'dropout_l0': 0.2} |
| Cluster_Static | annual   | {'learning_rate':<br>0.0031514252640<br>40375, 'optimizer':<br>'adam', 'epochs':<br>150, 'batch_size':<br>64, 'n_layers': 1,<br>'n_units_l0': 80,<br>'dropout_l0': 0.2}  | {'learning_rate':<br>0.0044709229134<br>21275, 'optimizer':<br>'adam', 'epochs':<br>350, 'batch_size':<br>208, 'n_layers': 1,<br>'n_units_l0': 60,<br>'dropout_l0': 0.2} | {'learning_rate':<br>0.0052693290249<br>71373, 'optimizer':<br>'adam', 'epochs':<br>150, 'batch_size':<br>240, 'n_layers': 1,<br>'n_units_l0': 80,<br>'dropout_l0': 0.2} |
|                | inertial | {'learning_rate':<br>0.0031514252640<br>40375, 'optimizer':<br>'adam', 'epochs':<br>150, 'batch_size':<br>64, 'n_layers': 1,<br>'n_units_l0': 80,<br>'dropout_l0': 0.2}  | {'learning_rate':<br>0.0050280148578<br>66192, 'optimizer':<br>'adam', 'epochs':<br>150, 'batch_size':<br>256, 'n_layers': 1,<br>'n_units_l0': 90,<br>'dropout_l0': 0.2} | {'learning_rate':<br>0.0031514252640<br>40375, 'optimizer':<br>'adam', 'epochs':<br>150, 'batch_size':<br>64, 'n_layers': 1,<br>'n_units_l0': 80,<br>'dropout_l0': 0.2}  |
|                | mixed    | {'learning_rate':<br>0.0010091326698<br>40099, 'optimizer':<br>'adam', 'epochs':<br>300, 'batch_size':<br>224, 'n_layers': 1,<br>'n_units_l0': 70,<br>'dropout_l0': 0.2} | {'learning_rate':<br>0.0052693290249<br>71373, 'optimizer':<br>'adam', 'epochs':<br>150, 'batch_size':<br>240, 'n_layers': 1,<br>'n_units_l0': 80,<br>'dropout_l0': 0.2} | {'learning_rate':<br>0.0052693290249<br>71373, 'optimizer':<br>'adam', 'epochs':<br>150, 'batch_size':<br>240, 'n_layers': 1,<br>'n_units_l0': 80,<br>'dropout_l0': 0.2} |



|                    |          |                                                                                                                                                    |                                                                                                                                                    |                                                                                                                                                    |
|--------------------|----------|----------------------------------------------------------------------------------------------------------------------------------------------------|----------------------------------------------------------------------------------------------------------------------------------------------------|----------------------------------------------------------------------------------------------------------------------------------------------------|
| Cluster_Static_OHE | annual   | {'learning_rate': 0.005269329024971373, 'optimizer': 'adam', 'epochs': 150, 'batch_size': 240, 'n_layers': 1, 'n_units_l0': 80, 'dropout_l0': 0.2} | {'learning_rate': 0.004470922913421275, 'optimizer': 'adam', 'epochs': 350, 'batch_size': 208, 'n_layers': 1, 'n_units_l0': 60, 'dropout_l0': 0.2} | {'learning_rate': 0.005269329024971373, 'optimizer': 'adam', 'epochs': 150, 'batch_size': 240, 'n_layers': 1, 'n_units_l0': 80, 'dropout_l0': 0.2} |
|                    | inertial | {'learning_rate': 0.005269329024971373, 'optimizer': 'adam', 'epochs': 150, 'batch_size': 240, 'n_layers': 1, 'n_units_l0': 80, 'dropout_l0': 0.2} | {'learning_rate': 0.003151425264040375, 'optimizer': 'adam', 'epochs': 150, 'batch_size': 64, 'n_layers': 1, 'n_units_l0': 80, 'dropout_l0': 0.2}  | {'learning_rate': 0.003151425264040375, 'optimizer': 'adam', 'epochs': 150, 'batch_size': 64, 'n_layers': 1, 'n_units_l0': 80, 'dropout_l0': 0.2}  |
|                    | mixed    | {'learning_rate': 0.005269329024971373, 'optimizer': 'adam', 'epochs': 150, 'batch_size': 240, 'n_layers': 1, 'n_units_l0': 80, 'dropout_l0': 0.2} | {'learning_rate': 0.005269329024971373, 'optimizer': 'adam', 'epochs': 150, 'batch_size': 240, 'n_layers': 1, 'n_units_l0': 80, 'dropout_l0': 0.2} | {'learning_rate': 0.001009132669840099, 'optimizer': 'adam', 'epochs': 300, 'batch_size': 224, 'n_layers': 1, 'n_units_l0': 70, 'dropout_l0': 0.2} |
